# Supplementary material
Source: PubMed Central journal article supplement (PMC8842115)
Supplement: ml1c00670_si_001.pdf [file ml1c00670_si_001.pdf]

## Supporting Information

### Hydrophobic Tagging–Induced Degradation of PDE $\delta$ in Colon Cancer Cells

Menglu Guo<sup>a,†</sup>, Shipeng He<sup>b,†</sup>, Junfei Cheng<sup>a</sup>, Yu Li<sup>a</sup>, Guoqiang Dong<sup>a,\*</sup>, Chunquan  
Sheng<sup>a,\*</sup>

<sup>a</sup> School of Pharmacy, Second Military Medical University, 325 Guohe Road,  
Shanghai 200433, China

<sup>b</sup> Institute of Translational Medicine, Shanghai University, Shanghai 200444, China

† These authors contributed equally to this work.

\***Corresponding authors:** E-mail: gdong@smmu.edu.cn, shengcq@smmu.edu.cn

## Table of Contents

|                                                                                                       |            |
|-------------------------------------------------------------------------------------------------------|------------|
| <b>Chemical Synthesis and Structural Characterization of Intermediates and Target Compounds. ....</b> | <b>S3</b>  |
| <b>Western Blot .....</b>                                                                             | <b>S23</b> |
| <b>The Molecular Docking Study.....</b>                                                               | <b>S24</b> |
| <b>In Vitro Antitumor Assay .....</b>                                                                 | <b>S24</b> |
| <b>Apoptosis Analysis by Flow Cytometry .....</b>                                                     | <b>S25</b> |
| <b>Figure S1.....</b>                                                                                 | <b>S25</b> |
| <b>Spectral data .....</b>                                                                            | <b>S26</b> |

## Chemical Synthesis and Structural Characterization of Intermediates and Target Compounds.

### Scheme S1

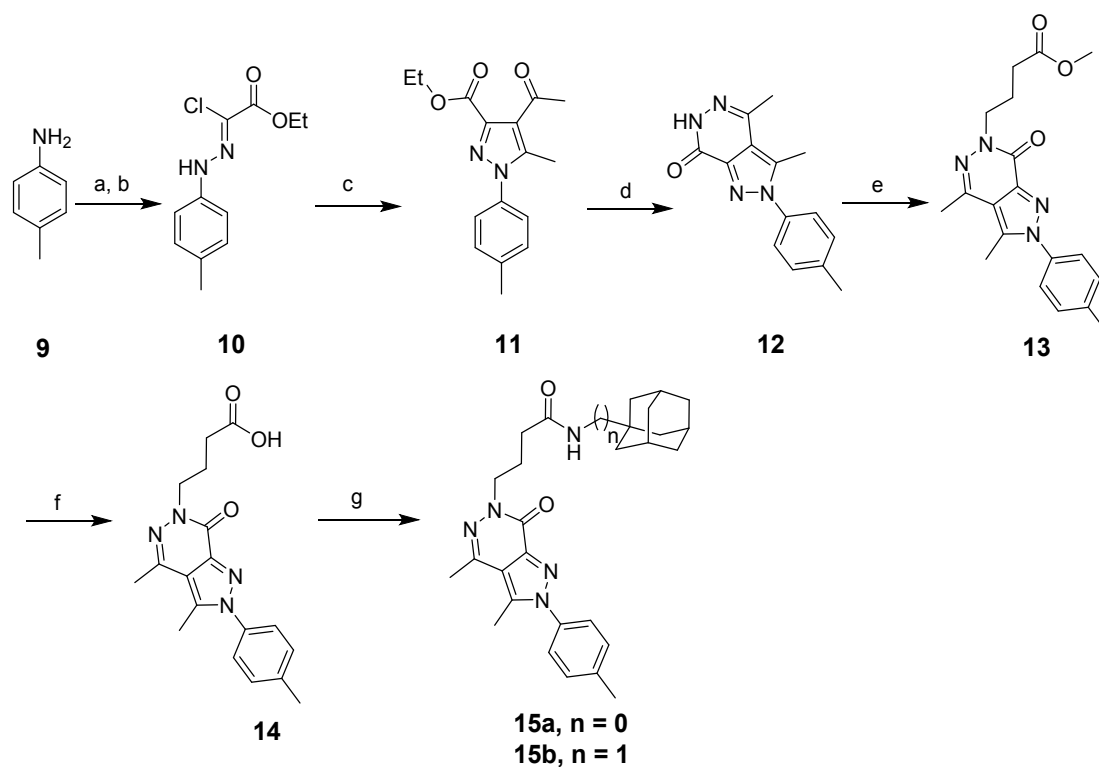

Reagents and conditions: (a)  $\text{NaNO}_2$ , 6 M HCl, 0 °C; (b) Ethyl 2-chloro-3-oxobutanoate, NaOAc, EtOH/ $\text{H}_2\text{O}$  = 7: 1, 0 °C, 4 h, 92%; (c) Pentane-2,4-dione, NaOEt, EtOH, rt, 16 h, 73%; (d) Hydrazine hydrate, EtOH, 110 °C, 6 h, 88%; (e) Methyl 4-bromobutanoate, NaH, DMF, 0 °C, 4 h, 76%; (f) LiOH, THF: MeOH:  $\text{H}_2\text{O}$  = 3: 2: 1, 1 h, 90%; (g) Amantadine/1-Adamantanemethylamine, HATU, DIPEA, DMF, rt, 4 h, 30-45%.

## Scheme S2

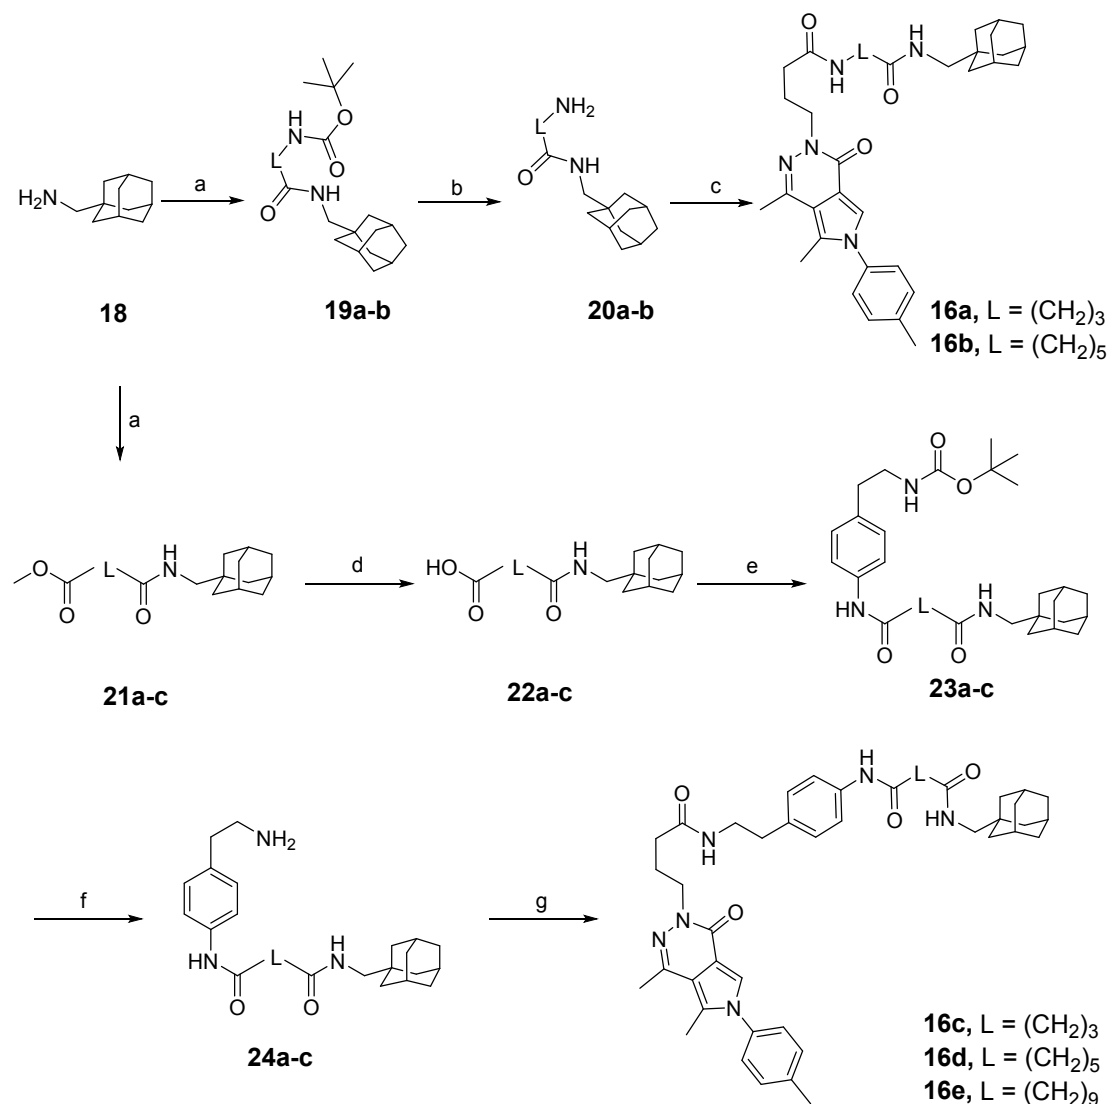

Reagents and conditions: (a) HATU, DIPEA, DMF, rt, 10 h, 70-90%; (b) DCM, TFA, rt, 1 h, 80-95%; (c) **14**, HATU, DIPEA, DMF, rt, 12 h, 40-50%; (d) LiOH, THF: MeOH: H<sub>2</sub>O = 1: 1: 1, rt, 2 h, 75-95%; (e) *tert*-Butyl 4-aminophenethylcarbamate, HATU, DIPEA, DMF, rt, 6 h, 80-90%; (f) DCM, TFA, rt, 2 h, 90-95%; (g) **14**, HATU, DIPEA, DMF, rt, 12 h, 30-35%.

### Scheme S3

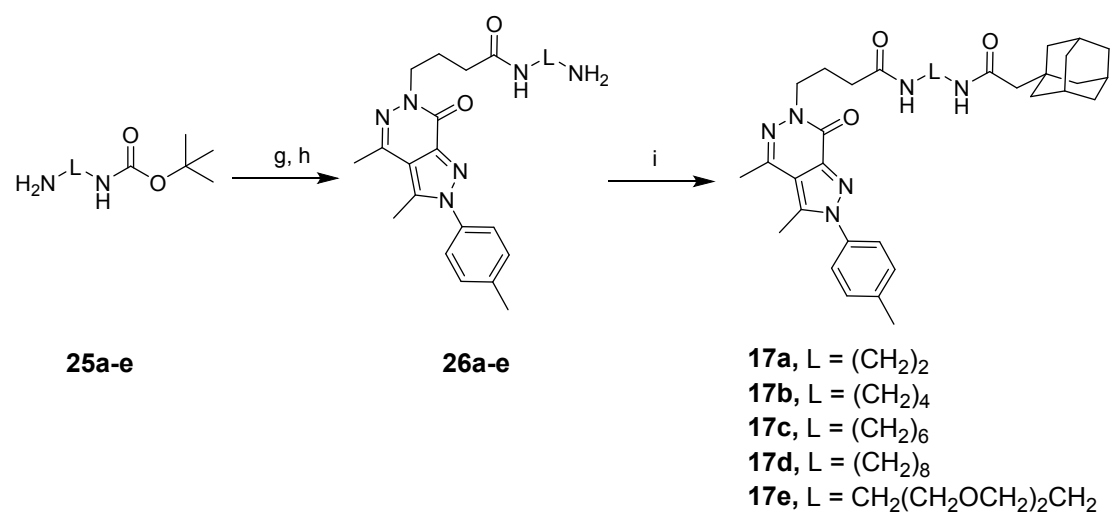

Reagents and conditions: (g) HBTU, DIPEA, DMF, rt, 4 h, 50-60% ; (h) DCM, TFA, rt, 1 h, 80-90%; (i) 1-Adamantaneacetic acid, HBTU, DIPEA, DMF, rt, 6 h, 10-80%.

### Scheme S4

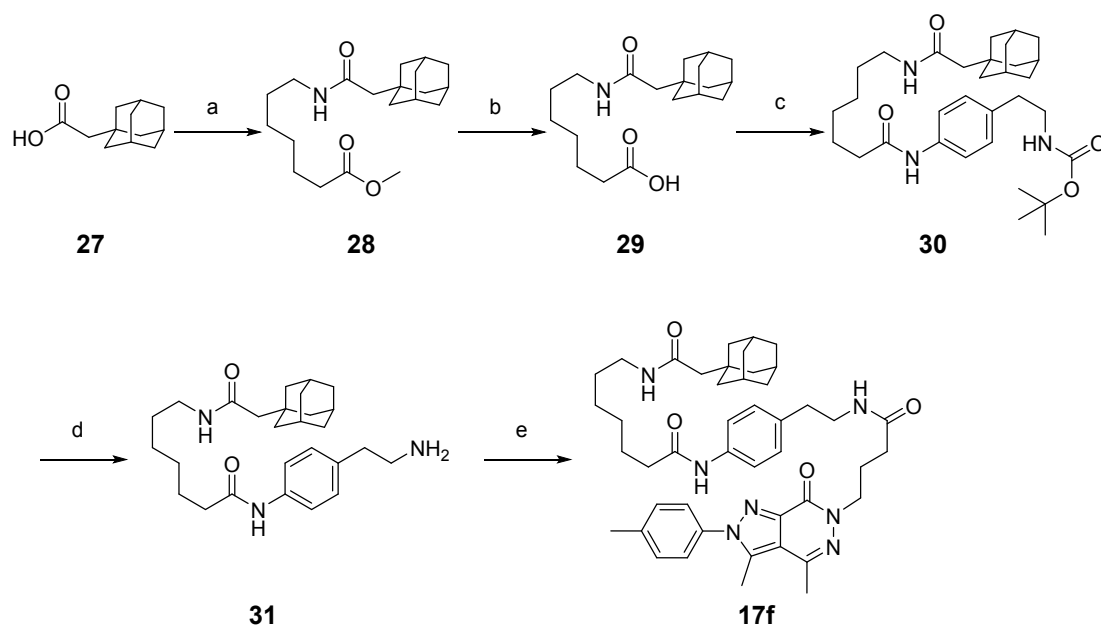

Reagents and conditions: (a) Methyl 7-aminoheptanoate, HATU, DIPEA, DMF, rt, 10 h, 90% (b) LiOH, THF: MeOH: H<sub>2</sub>O = 1: 1: 1, rt, 2 h, 88%; (c) *tert*-Butyl 4-aminophenethylcarbamate, HATU, DIPEA, DMF, rt, 6 h, 90%; (d) DCM, TFA, rt, 2 h, 95%; (e) **10**, HATU, DIPEA, DMF, rt, 12 h, 27%

**General.** Unless otherwise noted, all reagents were obtained from commercial suppliers and used without further purification. <sup>1</sup>H NMR and <sup>13</sup>C NMR spectra were recorded on Bruker AVANCE II 300 and AVANCE II 600 spectrometer (Bruker Company, Germany), using TMS as an internal standard and DMSO-*d*<sub>6</sub> as solvents. Chemical shifts were given in ppm ( $\delta$  values) and coupling constants were given in Hz (*J* values). The mass spectra were recorded on an Esquire 3000 LC-MS mass spectrometer. TLC analysis was executed on silica gel thin-layer plates GF254 (Qingdao Haiyang Chemical, China). Silica gel column chromatography was

performed with Silica gel 60 G (Qingdao Haiyang Chemical, China). The compounds were purified by HPLC (Agilent Eclipse Plus C18 5  $\mu$ m, 4.6 mm  $\times$  250 mm).

**4-(3,4-Dimethyl-7-oxo-2-(*p*-tolyl)-2,7-dihydro-6*H*-pyrazolo-[3,4-*d*]pyridazin-6-yl)butanoic Acid (14).** Starting from commercially available 4-methylaniline (**9**), the key intermediate **14** was synthesized via five steps according to the reported protocols.<sup>1</sup> <sup>1</sup>H-NMR (DMSO-*d*<sub>6</sub>, 600 MHz)  $\delta$ : 12.03 (s, 1H),  $\delta$  7.49 (d, *J* = 8.3 Hz, 2H), 7.43 (d, *J* = 8.3 Hz, 2H), 4.08 (t, *J* = 6.9 Hz, 2H), 2.59 (s, 3H), 2.52 (s, 3H), 2.43 (s, 3H), 2.27 (t, *J* = 7.4 Hz, 2H), 1.91-1.96 (m, 2H).

***N*-((3*s*,5*s*,7*s*)-Adamantan-1-yl)-4-(3,4-dimethyl-7-oxo-2-(*p*-tolyl)-2,7-dihydro-6*H*-pyrazolo[3,4-*d*]pyridazin-6-yl)butanamidem (15a).** Compound **14** (72 mg, 0.21 mmol), HATU (95 mg, 0.25 mmol), DIPEA (54 mg, 0.42 mmol) and amantadine (35 mg, 0.23 mmol) were dissolved in DMF (6 mL). The reaction solution was stirred for 4 h at room temperature. Then, the mixture was poured into water (20 mL) and extracted with EtOAc (3  $\times$  10 mL). The combined organic phase was washed with water (20 mL) and saturated NaCl solution (10 mL), dried over anhydrous Na<sub>2</sub>SO<sub>4</sub> and concentrated under the reduced pressure to give crude product, which was further purified by silica gel column chromatography (DCM: MeOH = 100: 2) to give **15a** (34.8 mg, 35% yield) as a white solid. <sup>1</sup>H-NMR (DMSO-*d*<sub>6</sub>, 600 MHz)  $\delta$ : 7.50 (d, *J* = 8.3 Hz, 2H), 7.46 (d, *J* = 8.2 Hz, 2H), 7.28 (s, 1H), 4.05 (t, *J* = 7.2 Hz, 2H), 2.62 (s, 3H), 2.54 (s, 3H), 2.45 (s, 3H), 2.07 (t, *J* = 7.5 Hz, 2H), 2.00 (s, 3H), 1.94–1.85 (m,

8H), 1.66–1.58 (m, 6H). <sup>13</sup>C NMR (DMSO-*d*<sub>6</sub>, 150 MHz)  $\delta$ : 171.3, 155.6, 141.6, 141.4, 139.8, 137.9, 136.4, 130.4, 126.2, 117.6, 50.9, 49.1, 41.5, 36.5, 33.9, 29.3, 25.2, 21.2, 19.9, 12.3. HR-MS *m/z* Calcd. for C<sub>28</sub>H<sub>36</sub>N<sub>5</sub>O<sub>2</sub> [M+H]<sup>+</sup> 474.2864, Found 474.2854.

Target compound **15b** was synthesized according to a similar procedure described for **15a**.

***N*-(((3*r*,5*r*,7*r*)-Adamantan-1-yl)methyl)-4-(3,4-dimethyl-7-oxo-2-(*p*-tolyl)-2,7-dihydro-6*H*-pyrazolo[3,4-*d*]pyridazin-6-yl)butanamide (15b)**. White solid (61 mg, 45% yield). <sup>1</sup>H-NMR (DMSO-*d*<sub>6</sub>, 600 MHz)  $\delta$ : 7.68 (t, *J* = 6.1 Hz, 1H), 7.51 (d, *J* = 8.3 Hz, 2H), 7.46 (d, *J* = 8.1 Hz, 2H), 4.07 (t, *J* = 7.1 Hz, 2H), 2.77 (d, *J* = 6.2 Hz, 2H), 2.62 (s, 3H), 2.54 (s, 3H), 2.45 (s, 3H), 2.17 (t, *J* = 7.6 Hz, 2H), 1.96–1.90 (m, 5H), 1.66 (d, *J* = 12.0 Hz, 3H), 1.59 (d, *J* = 11.5 Hz, 3H), 1.43 (s, 6H). <sup>13</sup>C NMR (DMSO-*d*<sub>6</sub>, 150 MHz)  $\delta$ : 172.1, 155.6, 141.6, 141.5, 139.8, 137.9, 136.4, 130.4, 126.2, 117.6, 100.0, 50.5, 49.2, 37.0, 34.0, 33.2, 28.2, 25.4, 21.2, 19.9, 12.3. HR-MS *m/z* Calcd. for C<sub>29</sub>H<sub>37</sub>N<sub>5</sub>O<sub>2</sub>Cl [M+Cl]<sup>-</sup> 522.2641, Found 522.2656

***tert*-Butyl (4-(((3*r*,5*r*,7*r*)-adamantan-1-yl)methyl)amino)-4-oxobutyl)carbamate (19a)**. To a solution of 4-((*tert*-butoxycarbonyl)amino)butanoic acid (270 mg, 1.33 mmol), HATU (920 mg, 2.4 mmol) and DIPEA (429 mg, 3.63 mmol) in DMF (5 mL) was added 1-adamantanemethylamine (200 mg, 1.21 mmol). The reaction mixture was stirred for 8 h at room temperature. The reacted solution was poured into water



(30 mL), and extracted with EtOAc (3 × 10 mL). The combined organic phase was washed with saturated NaCl solution (30 mL), water (30 mL), dried over anhydrous Na<sub>2</sub>SO<sub>4</sub>. The organic layer was then concentrated under the reduced pressure to obtain crude product, which was purified by silica gel column chromatography (PE: EA = 1: 1) to give compound **19a** (400 mg, 90% yield) as a yellow oil. <sup>1</sup>H-NMR (DMSO-*d*<sub>6</sub>, 600 MHz) δ: 7.62 (t, *J* = 6.2 Hz, 1H), 6.79 (t, *J* = 5.4 Hz, 1H), 2.91 (dd, *J* = 13.1, 6.7 Hz, 2H), 2.75 (d, *J* = 6.3 Hz, 2H), 2.70 (s, 1H), 2.09 (t, *J* = 7.5 Hz, 2H), 1.92 (s, 3H), 1.66 (d, *J* = 12.0 Hz, 3H), 1.58 (d, *J* = 8.2 Hz, 4H), 1.44–1.36 (m, 15H).

Compound **19b** was synthesized according to a similar procedure described for **19a**.

**tert-Butyl (6-(((3*r*,5*r*,7*r*)-adamantan-1-yl)methyl)amino)-6-oxohexyl)carbamate (19b).** <sup>1</sup>H-NMR (DMSO-*d*<sub>6</sub>, 600 MHz) δ: 7.59 (t, *J* = 6.1 Hz, 1H), 6.75 (t, *J* = 5.2 Hz, 1H), 2.90 (dd, *J* = 13.0, 6.9 Hz, 2H), 2.76 (d, *J* = 6.3 Hz, 2H), 2.71 (s, 1H), 2.10 (t, *J* = 7.4 Hz, 2H), 1.93 (s, 3H), 1.67 (d, *J* = 12.0 Hz, 3H), 1.59 (d, *J* = 11.4 Hz, 3H), 1.53–1.25 (m, 20H).

***N*-(((3*r*,5*r*,7*r*)-Adamantan-1-yl)methyl)-4-(4-(3,4-dimethyl-7-oxo-2-(*p*-tolyl)-2,7-dihydro-6*H*-pyrazolo[3,4-*d*]pyridazin-6-yl)butanamido)butanamide (16a).** TFA (2 mL) was added to a stirred solution of compound **19a** (400 mg, 1.14 mmol) in dry DCM (3 mL) dropwise. The reaction mixture was stirred for 3 h at room temperature. The solvent was evaporated under reduced pressure to give crude product **20a**, which was then dissolved in DMF (3 mL). Subsequently, HATU (160 mg, 0.42 mmol),

DIPEA (80 mg, 0.63 mmol) and compound **14** (70 mg, 0.21 mmol) were added. The mixture solution was stirred for 2 h at room temperature. Then, the resulting solution was poured into water (20 mL) and extracted with EtOAc (3 × 10 mL). The combined organic phase was washed with saturated NaCl solution (10 mL), water (10 mL), dried over anhydrous Na<sub>2</sub>SO<sub>4</sub>. The organic layer was then concentrated under reduced pressure to obtain the crude product, which was purified by column chromatography (DCM: MeOH = 100: 10) to give compound **16a** as a white solid (57 mg, 47.5% yield). <sup>1</sup>H-NMR (DMSO-*d*<sub>6</sub>, 600 MHz) δ: 7.82 (t, *J* = 5.4 Hz, 1H), 7.65 (t, *J* = 6.1 Hz, 1H), 7.50 (d, *J* = 8.3 Hz, 2H), 7.46 (d, *J* = 8.1 Hz, 2H), 4.06 (t, *J* = 7.0 Hz, 2H), 3.04 (dd, *J* = 12.9, 6.8 Hz, 2H), 2.76 (d, *J* = 6.2 Hz, 2H), 2.62 (s, 3H), 2.54 (s, 3H), 2.45 (s, 3H), 2.11 (dd, *J* = 10.6, 4.3 Hz, 4H), 1.99–1.87 (m, 5H), 1.65 (d, *J* = 11.5 Hz, 3H), 1.63–1.54 (m, 5H), 1.42–1.41 (m, 6H). <sup>13</sup>C NMR (DMSO-*d*<sub>6</sub>, 150 MHz) δ: 172.3, 171.8, 155.6, 141.5, 139.8, 137.9, 136.4, 130.4, 126.2, 117.6, 50.5, 49.0, 38.67, 36.9, 34.0, 33.5, 33.1, 28.1, 26.2, 25.1, 21.2, 19.9, 12.3. HR-MS *m/z* Calcd. for C<sub>33</sub>H<sub>45</sub>N<sub>6</sub>O<sub>3</sub> [M+H]<sup>+</sup> 573.3548, Found 573.3568

Compound **16b** was synthesized according to a similar procedure described for **16a**.

***N*-(((3*r*,5*r*,7*r*)-Adamantan-1-yl)methyl)-6-(4-(3,4-dimethyl-7-oxo-2-(*p*-tolyl)-2,7-dihydro-6*H*-pyrazolo[3,4-*d*]pyridazin-6-yl)butanamido)hexanamide (16b)**. White solid (54 mg, 42.9% yield). <sup>1</sup>H-NMR (DMSO-*d*<sub>6</sub>, 600 MHz) δ: 7.79 (t, *J* = 5.3 Hz, 1H), 7.60 (t, *J* = 6.0 Hz, 1H), 7.50 (d, *J* = 8.2 Hz, 2H), 7.45 (d, *J* = 8.2 Hz, 2H), 4.05 (t, *J* = 7.0 Hz, 2H), 3.02 (dd, *J* = 12.7, 6.5 Hz, 2H), 2.75 (d, *J* = 6.2 Hz, 2H), 2.61 (s,

3H), 2.54 (s, 3H), 2.45 (s, 3H), 2.10 (q,  $J = 7.5$  Hz, 4H), 1.95-1.93 (m, 2H), 1.91 (s, 3H), 1.65 (d,  $J = 11.9$  Hz, 3H), 1.57 (d,  $J = 11.7$  Hz, 3H), 1.52-1.47 (m, 2H), 1.40 (s, 6H), 1.39-1.37 (m, 2H), 1.27-1.22 (m, 2H).  $^{13}\text{C}$  NMR (DMSO- $d_6$ , 150 MHz)  $\delta$ : 172.7, 171.7, 155.6, 141.5, 139.8, 137.9, 136.3, 130.3, 126.2, 117.6, 50.5, 49.1, 38.8, 37.0, 35.8, 34.0, 33.1, 29.3, 28.1, 26.6, 25.7, 25.1, 21.2, 19.8, 12.3. HR-MS  $m/z$  Calcd. for  $\text{C}_{35}\text{H}_{49}\text{N}_6\text{O}_3$   $[\text{M}+\text{H}]^+$  601.3861, Found 601.3883

**Methyl 5-(((3*r*,5*r*,7*r*)-adamantan-1-yl)methyl)amino)-5-oxopentanoate (21a).**

5-Methoxy-5-oxopentanoic acid **14** (570 mg, 3.9 mmol), HATU (2660 mg, 7 mmol) and DIPEA (1241 mg, 10.5 mmol) were dissolved in anhydrous DMF (5 mL). After the addition of 1-adamantanemethylamine (579 mg, 3.5 mmol), the reaction mixture was stirred for 4 h at room temperature and then diluted with EtOAc (20 mL). The organic phase was washed with water (10 mL), saturated NaCl solution (10 mL) and dried over anhydrous  $\text{Na}_2\text{SO}_4$ . The resulting solution was concentrated under reduced pressure to give the crude product, which was purified by column chromatography (PE: EA = 1: 1) to give compound **21a** (835.1 mg, 81.3% yield ) as a yellow oil.  $^1\text{H}$ -NMR (DMSO- $d_6$ , 600 MHz)  $\delta$ : 7.62 (t,  $J = 5.9$  Hz, 1H), 3.58 (s, 3H), 2.75 (d,  $J = 6.3$  Hz, 2H), 2.29 (t,  $J = 7.4$  Hz, 2H), 2.13 (t,  $J = 7.4$  Hz, 2H), 1.91 (s, 3H), 1.77–1.70 (m, 2H), 1.66–1.64 (m, 3H), 1.58–1.56 (m, 3H), 1.42–1.41 (m, 6H).

Compounds **21b-c** were synthesized according to a similar procedure described for

**21a.**

**Methyl 7-(((3*r*,5*r*,7*r*)-adamantan-1-yl)methyl)amino)-7-oxoheptanoate (21b).**

<sup>1</sup>H-NMR (DMSO-*d*<sub>6</sub>, 600 MHz)  $\delta$ : 7.61 (t, *J* = 6.1 Hz, 1H), 3.58 (s, 3H), 2.75 (d, *J* = 6.3 Hz, 2H), 2.29 (t, *J* = 7.4 Hz, 2H), 2.09 (t, *J* = 7.4 Hz, 2H), 1.92 (s, 3H), 1.66 (d, *J* = 12.0 Hz, 3H), 1.60–1.55 (m, 3H), 1.55–1.46 (m, 4H), 1.41–1.40 (m, 6H), 1.28–1.22 (m, 2H).

**Methyl 11-(((3*r*,5*r*,7*r*)-adamantan-1-yl)methyl)amino)-11-oxoundecanoate (21c).**

<sup>1</sup>H-NMR (DMSO-*d*<sub>6</sub>, 600 MHz)  $\delta$ : 7.56 (t, *J* = 6.2 Hz, 1H), 3.56 (s, 3H), 2.73 (d, *J* = 6.3 Hz, 2H), 2.26 (t, *J* = 7.4 Hz, 2H), 2.07 (t, *J* = 7.3 Hz, 2H), 1.90 (s, 3H), 1.65–1.63 (m, 3H), 1.56–1.54 (m, 3H), 1.50–1.45 (m, 4H), 1.40–1.39 (m, 6H), 1.23 (s, 10H).

**5-(((3*r*,5*r*,7*r*)-Adamantan-1-yl)methyl)amino)-5-oxopentanoic acid (22a).** To a solution of compound **21a** (350 mg, 1.2 mmol) in THF: MeOH: H<sub>2</sub>O = 1: 1:1 (30 mL) was added 2 N LiOH (1.8 mL, 3.6 mmol). The reaction mixture was stirred for 2 h at room temperature. Then, the organic solvent was removed under the reduced pressure, and the pH of the residual aqueous solution was adjusted to 2 with 2 N aqueous HCl to afford precipitate. The precipitate was filtered and washed with water (3 × 5 mL) to give compound **22a** (280 mg, 84% yield) as white solid. <sup>1</sup>H-NMR (DMSO-*d*<sub>6</sub>, 600 MHz)  $\delta$ : 7.64 (t, *J* = 6.0 Hz, 1H), 2.76 (d, *J* = 6.3 Hz, 2H), 2.21 (t, *J* = 7.4 Hz, 2H), 2.13 (t, *J* = 7.4 Hz, 2H), 1.92 (s, 3H), 1.74–1.69 (m, 2H), 1.67–1.65 (m, 3H), 1.59–1.57 (m, 3H), 1.42–1.41 (m, 6H).

Compounds **22b-c** were synthesized according to a similar procedure described for **22a**.

**7-((((3*r*,5*r*,7*r*)-Adamantan-1-yl)methyl)amino)-7-oxoheptanoic acid (22b).**

<sup>1</sup>H-NMR (DMSO-*d*<sub>6</sub>, 600 MHz)  $\delta$ : 11.95 (s, 1H), 7.57 (t, *J* = 6.1 Hz, 1H), 2.74 (d, *J* = 6.2 Hz, 2H), 2.18 (t, *J* = 7.4 Hz, 2H), 2.08 (t, *J* = 7.4 Hz, 2H), 1.91 (s, 3H), 1.65 (d, *J* = 12.0 Hz, 3H), 1.57 (d, *J* = 11.6 Hz, 3H), 1.53–1.45 (m, 4H), 1.41 (d, *J* = 2.0 Hz, 6H), 1.28–1.20 (m, 2H).

**11-((((3*r*,5*r*,7*r*)-Adamantan-1-yl)methyl)amino)-11-oxoundecanoic acid (22c).**

<sup>1</sup>H-NMR (DMSO-*d*<sub>6</sub>, 600 MHz)  $\delta$ : 11.96 (s, 1H), 7.58 (t, *J* = 6.0 Hz, 1H), 2.76 (d, *J* = 6.3 Hz, 2H), 2.19 (t, *J* = 7.4 Hz, 2H), 2.09 (t, *J* = 7.3 Hz, 2H), 1.92 (s, 3H), 1.67–1.65 (m, 3H), 1.59–1.57 (m, 3H), 1.51–1.46 (m, 4H), 1.42–1.41 (m, 6H), 1.25 (s, 10H).

***tert*-Butyl (4-(5-((((3*r*,5*r*,7*r*)-adamantan-1-yl)methyl)amino)-5-oxopentanamido)phenethyl)carbamate (23a).** HATU (222 mg, 0.6 mmol), DIPEA (0.16 mL, 0.9 mmol) and 4-aminophenethylcarbamate (70 mg, 0.3 mmol) were added sequentially to a solution of **22a** (90 mg, 0.32 mmol) in DMF (5 mL). The solution was stirred for 6 h at room temperature. Then, the mixture was poured into water (20 mL) and extracted with EtOAc (3 × 5 mL). The combined organic layer was washed with saturated NaCl solution (3 × 10 mL), dried over anhydrous Na<sub>2</sub>SO<sub>4</sub>, filtered, and evaporated under reduced pressure to get crude product, which was purified by

column chromatography (DCM : MeOH = 100 : 9) to give intermediate **23a** as a yellow oil (135 mg, 85% yield). <sup>1</sup>H-NMR (DMSO-*d*<sub>6</sub>, 600 MHz)  $\delta$ : 9.82 (s, 1H), 7.66 (t, *J* = 6.2 Hz, 1H), 7.51 (d, *J* = 8.4 Hz, 2H), 7.25 (d, *J* = 8.3 Hz, 1H), 7.11 (d, *J* = 8.4 Hz, 2H), 6.96 (d, *J* = 8.3 Hz, 1H), 3.11 (dd, *J* = 14.3, 6.7 Hz, 2H), 2.78 (d, *J* = 6.2 Hz, 2H), 2.71 (s, 2H), 2.64 (t, *J* = 7.6 Hz, 2H), 2.31 (t, *J* = 7.4 Hz, 2H), 2.17 (t, *J* = 7.5 Hz, 2H), 1.93 (s, 3H), 1.84–1.79 (m, 2H), 1.68–1.66 (m, 3H), 1.60–1.58 (m, 3H), 1.38–1.37 (m, 12H).

Compounds **23b-c** were synthesized according to a similar procedure described for **23a**.

**tert-Butyl (4-(7-(((3*r*,5*r*,7*r*)-adamantan-1-yl)methyl)amino)-7-oxoheptanamido)phenethyl)carbamate (23b).** <sup>1</sup>H-NMR (DMSO-*d*<sub>6</sub>, 600 MHz)  $\delta$ : 9.78 (s, 1H), 7.59 (t, *J* = 6.1 Hz, 1H), 7.49 (d, *J* = 8.4 Hz, 2H), 7.09 (d, *J* = 8.4 Hz, 2H), 6.85 (t, *J* = 5.5 Hz, 1H), 3.10 (dd, *J* = 14.1, 6.5 Hz, 2H), 2.76–2.73 (m, 2H), 2.67–2.59 (m, 2H), 2.27 (t, *J* = 7.4 Hz, 2H), 2.11 (t, *J* = 7.4 Hz, 2H), 1.91 (s, 3H), 1.66–1.64 (m, 3H), 1.60–1.56 (m, 5H), 1.54–1.50 (m, 3H), 1.37–1.36 (m, 10H), 1.28–1.24 (m, 6H).

**tert-Butyl (4-(11-(((3*r*,5*r*,7*r*)-adamantan-1-yl)methyl)amino)-11-oxoundecanamido)phenethyl)carbamate (23c)** <sup>1</sup>H-NMR (DMSO-*d*<sub>6</sub>, 600 MHz)  $\delta$ : 9.77 (s, 1H), 7.59 (t, *J* = 6.1 Hz, 1H), 7.49 (d, *J* = 8.4 Hz, 2H), 7.09 (d, *J* = 8.3 Hz, 2H), 6.84 (t, *J* = 5.3 Hz, 1H), 3.10 (dd, *J* = 13.9, 6.6 Hz, 2H), 2.75 (t, *J* = 4.8 Hz, 2H), 2.63 (t, *J* = 7.5

Hz, 2H), 2.27 (t,  $J = 7.4$  Hz, 2H), 2.09 (t,  $J = 7.3$  Hz, 2H), 1.91 (s, 3H), 1.66–1.64 (m, 3H), 1.58–1.56 (m, 5H), 1.53–1.44 (m, 3H), 1.37–1.36 (m, 10H), 1.28–1.24 (m, 14H).

***N*<sup>1</sup>-(((3*r*,5*r*,7*r*)-Adamantan-1-yl)methyl)-*N*<sup>5</sup>-(4-(2-(4-(3,4-dimethyl-7-oxo-2-(*p*-tolyl)-2,7-dihydro-6*H*-pyrazolo[3,4-*d*]pyridazin-6-yl)butanamido)ethyl)phenyl)glutar amide (16c).** HATU (160 mg, 0.25 mmol) and DIPEA (0.12 mL, 0.63 mmol) were added to a solution of compound 6 (70 mg, 0.21 mmol) in DMF (5 mL), followed by the addition of compound 24a (98 mg, 0.25 mmol). The solution was stirred for 6 h at room temperature. The reaction mixture was poured into water (20 mL) and extracted with EtOAc (3 × 5 mL). The combined organic layer was washed with saturated NaCl solution (3 × 20 mL), dried over anhydrous Na<sub>2</sub>SO<sub>4</sub>, filtered, and concentrated under reduced pressure to give the impure product. The crude product was purified by column chromatography (DCM: MeOH = 100: 9) to give target compound 16c as a white solid (44.6 mg, 30% yield). <sup>1</sup>H-NMR (DMSO-*d*<sub>6</sub>, 600 MHz)  $\delta$ : 9.80 (s, 1H), 7.87 (t,  $J = 5.8$  Hz, 1H), 7.64 (t,  $J = 6.8$  Hz, 1H), 7.49 (dd,  $J = 8.0, 5.9$  Hz, 4H), 7.44 (d,  $J = 8.3$  Hz, 2H), 7.11 (d,  $J = 8.3$  Hz, 2H), 4.03 (t,  $J = 7.1$  Hz, 2H), 3.22 (dd,  $J = 13.7, 7.2$  Hz, 2H), 2.76 (d,  $J = 6.2$  Hz, 2H), 2.63 (t,  $J = 7.4$  Hz, 2H), 2.60 (s, 3H), 2.53 (s, 3H), 2.44 (s, 3H), 2.29 (t,  $J = 7.5$  Hz, 2H), 2.16 (t,  $J = 7.5$  Hz, 2H), 2.10 (t,  $J = 7.6$  Hz, 2H), 1.94–1.89(m, 5H), 1.83–1.77 (m, 2H), 1.66–1.64 (m, 3H), 1.58–1.56 (m, 3H), 1.41 (s, 6H). <sup>13</sup>C NMR (DMSO-*d*<sub>6</sub>, 150 MHz)  $\delta$ : 172.3, 171.8, 171.1, 155.1, 141.5, 139.8, 137.9, 136.3, 134.5, 130.3, 129.1, 126.2, 119.5, 117.6, 50.5, 49.0, 36.9,

36.3, 35.1, 34.0, 33.1, 28.2, 25.1, 21.9, 21.2, 19.9. HR-MS  $m/z$  Calcd. for  $C_{42}H_{54}N_7O_4$   
[M+H]<sup>+</sup> 720.4232, Found 720.4250

Compounds **16d-e** were synthesized according to a similar procedure described for  
**16c**.

***N*<sup>1</sup>-(((3*r*,5*r*,7*r*)-Adamantan-1-yl)methyl)-*N*<sup>7</sup>-(4-(2-(4-(3,4-dimethyl-7-oxo-2-(*p*-tolyl)-2,7-dihydro-6*H*-pyrazolo[3,4-*d*]pyridazin-6-yl)butanamido)ethyl)phenyl)**

**heptanediamide (16d)**. White solid (58.7 mg, 35.7% yield). <sup>1</sup>H-NMR (DMSO-*d*<sub>6</sub>, 600 MHz)  $\delta$ : 9.77 (s, 1H), 7.87 (t,  $J$  = 5.4 Hz, 1H), 7.58 (t,  $J$  = 6.0 Hz, 1H), 7.48 (d,  $J$  = 8.3 Hz, 4H), 7.43 (d,  $J$  = 8.1 Hz, 2H), 7.09 (d,  $J$  = 8.3 Hz, 2H), 4.02 (t,  $J$  = 7.0 Hz, 2H), 3.21 (dd,  $J$  = 13.3, 6.8 Hz, 2H), 2.73 (d,  $J$  = 6.2 Hz, 2H), 2.65–2.55 (m, 5H), 2.52 (s, 3H), 2.42 (s, 3H), 2.25 (t,  $J$  = 7.4 Hz, 2H), 2.09 (t,  $J$  = 6.1 Hz, 4H), 1.93–1.85 (m, 5H), 1.64–1.62 (m, 3H), 1.58–1.49 (m, 7H), 1.39 (s, 6H), 1.31–1.21 (m, 2H). <sup>13</sup>C NMR (DMSO-*d*<sub>6</sub>, 150 MHz)  $\delta$ : 172.7, 171.8, 171.4, 155.6, 141.6, 141.4, 139.8, 137.9, 136.3, 134.5, 130.3, 129.1, 126.1, 119.5, 117.6, 50.5, 49.0, 40.7, 37.0, 36.7, 35.8, 35.1, 34.0, 33.1, 28.8, 28.2, 25.8, 25.4, 25.1, 21.2, 19.9, 12.3. HR-MS  $m/z$  Calcd. for  $C_{44}H_{58}N_7O_4$  [M+H]<sup>+</sup> 748.4545, Found 748.4558

***N*<sup>1</sup>-(((3*r*,5*r*,7*r*)-Adamantan-1-yl)methyl)-*N*<sup>11</sup>-(4-(2-(4-(3,4-dimethyl-7-oxo-2-(*p*-tolyl)-2,7-dihydro-6*H*-pyrazolo[3,4-*d*]pyridazin-6-yl)butanamido)ethyl)phenyl)**

**undecanediamide (16e)**. White solid (47 mg, 34.4% yield). <sup>1</sup>H-NMR (DMSO-*d*<sub>6</sub>, 600 MHz)  $\delta$ : 9.77 (s, 1H), 7.88 (s, 1H), 7.60 (s, 1H), 7.48 (d,  $J$  = 8.3 Hz, 4H), 7.44 (d,  $J$  =



8.1 Hz, 2H), 7.10 (d,  $J = 8.2$  Hz, 2H), 4.03 (t,  $J = 6.9$  Hz, 2H), 3.22 (dd,  $J = 13.1, 6.8$  Hz, 2H), 2.74 (d,  $J = 6.1$  Hz, 2H), 2.65–2.57 (m, 5H), 2.53 (s, 3H), 2.43 (s, 3H), 2.25 (t,  $J = 7.4$  Hz, 2H), 2.11–2.07 (m, 4H), 1.92–1.90 (m, 5H), 1.65–1.63 (m, 3H), 1.56–1.55 (m, 5H), 1.48 (s, 3H), 1.41–1.40 (m, 7H), 1.27–1.25 (m, 8H).  $^{13}\text{C}$  NMR (DMSO- $d_6$ , 150 MHz)  $\delta$ : 172.8, 171.9, 171.5, 155.7, 141.6, 139.8, 137.9, 136.5, 134.5, 130.4, 129.2, 126.2, 119.6, 117.6, 50.5, 49.0, 40.7, 37.0, 36.8, 35.9, 35.1, 34.1, 33.1, 29.3, 29.1, 28.2, 25.9, 25.6, 25.1, 21.2, 19.8, 12.3. HR-MS  $m/z$  Calcd. for  $\text{C}_{48}\text{H}_{66}\text{N}_7\text{O}_4$   $[\text{M}+\text{H}]^+$  804.5171, Found 804.5198

***tert*-Butyl (2-(4-(3,4-dimethyl-7-oxo-2-(*p*-tolyl)-2,7-dihydro-6*H*-pyrazolo[3,4-*d*]pyridazin-6-yl)butanamido)ethyl)carbamate (26a).** HBTU (67 mg, 0.18 mmol), DIPEA (0.07 mL, 0.36 mmol) and compound **14** (40 mg, 0.12 mmol) were added to a solution of *tert*-butyl (2-aminoethyl)carbamate **25a** (29 mg, 0.18 mmol) in anhydrous DMF (2 mL). The solution was stirred for 4 h at room temperature. Then the reaction mixture was poured into water (20 mL) and extracted with EtOAc (3  $\times$  5 mL). The combined organic phase was washed with saturated NaCl solution (10 mL), dried over anhydrous  $\text{Na}_2\text{SO}_4$ , filtered and concentrated under reduced pressure to afford the crude product. The crude product was purified by column chromatography (DCM: MeOH = 100: 7) to give compound **26a** (50.3 mg, 88.4% yield) as a yellow oil.  $^1\text{H}$ -NMR (DMSO- $d_6$ , 600 MHz)  $\delta$ : 7.82 (t,  $J = 5.5$  Hz, 1H), 7.49 (d,  $J = 8.3$  Hz, 2H), 7.44 (d,  $J = 8.3$  Hz, 2H), 6.78 (t,  $J = 5.6$  Hz, 1H), 4.05 (t,  $J = 7.0$  Hz, 2H), 3.05 (dd,  $J$

= 12.3, 6.2 Hz, 2H), 2.96 (dd,  $J = 12.4, 6.2$  Hz, 2H), 2.60 (s, 3H), 2.53 (s, 3H), 2.44 (s, 3H), 2.11 (t,  $J = 7.6$  Hz, 2H), 1.97–1.89 (m, 2H), 1.36 (s, 9H).

Compounds **26b-e** were synthesized according to a similar procedure described for **26a**.

**tert-Butyl (4-(4-(3,4-dimethyl-7-oxo-2-(*p*-tolyl)-2,7-dihydro-6*H*-pyrazolo[3,4-*d*]pyridazin-6-yl)butanamido)butyl)carbamate (26b).**  $^1\text{H-NMR}$  (DMSO- $d_6$ , 600 MHz)  $\delta$ : 7.77 (t,  $J = 5.4$  Hz, 1H), 7.48 (d,  $J = 8.3$  Hz, 2H), 7.43 (d,  $J = 8.1$  Hz, 2H), 6.76 (t,  $J = 5.3$  Hz, 1H), 4.03 (t,  $J = 7.0$  Hz, 2H), 3.00 (d,  $J = 5.3$  Hz, 2H), 2.88 (d,  $J = 5.5$  Hz, 2H), 2.59 (s, 3H), 2.52 (s, 3H), 2.43 (s, 3H), 2.09 (t,  $J = 7.6$  Hz, 2H), 1.94–1.87 (m, 2H), 1.37–1.34 (m, 13H).

**tert-Butyl (6-(4-(3,4-dimethyl-7-oxo-2-(*p*-tolyl)-2,7-dihydro-6*H*-pyrazolo[3,4-*d*]pyridazin-6-yl)butanamido)hexyl)carbamate (26c).**  $^1\text{H-NMR}$  (DMSO- $d_6$ , 600 MHz)  $\delta$ : 7.75 (d,  $J = 5.3$  Hz, 1H), 7.49 (d,  $J = 8.3$  Hz, 2H), 7.45 (d,  $J = 8.3$  Hz, 2H), 6.75 (s, 1H), 4.05 (t,  $J = 7.1$  Hz, 2H), 3.10 (t,  $J = 7.2$  Hz, 1H), 3.01 (dd,  $J = 12.9, 6.7$  Hz, 2H), 2.61 (s, 3H), 2.53 (s, 3H), 2.44 (s, 3H), 2.10 (t,  $J = 7.7$  Hz, 2H), 1.93 (dd,  $J = 14.6, 7.3$  Hz, 2H), 1.52 (s, 1H), 1.37 (s, 9H), 1.26–1.23 (m, 8H).

**tert-Butyl (8-(4-(3,4-dimethyl-7-oxo-2-(*p*-tolyl)-2,7-dihydro-6*H*-pyrazolo[3,4-*d*]pyridazin-6-yl)butanamido)octyl)carbamate (26d).**  $^1\text{H-NMR}$  (DMSO- $d_6$ , 600 MHz)  $\delta$ : 7.76 (s, 1H), 7.50 (d,  $J = 8.4$  Hz, 2H), 7.45 (d,  $J = 8.2$  Hz, 2H), 6.75 (s, 1H),

5.77 (s, 5H), 4.04 (t,  $J = 7.1$  Hz, 2H), 3.10 (dd,  $J = 13.3, 3.8$  Hz, 1H), 3.01 (dd,  $J = 12.5, 6.7$  Hz, 2H), 2.61 (s, 3H), 2.53 (s, 3H), 2.44 (s, 3H), 2.13–2.07 (m, 2H), 1.92 (t,  $J = 7.4$  Hz, 2H), 1.37 (s, 9H), 1.27–1.24 (m, 8H).

**tert-Butyl (2-(2-(2-(4-(3,4-dimethyl-7-oxo-2-(*p*-tolyl)-2,7-dihydro-6*H*-pyrazolo[3,4-*d*]pyridazin-6-yl)butanamido)ethoxy)ethoxy)ethyl)carbamate (26e).** <sup>1</sup>H-NMR (DMSO-*d*<sub>6</sub>, 600 MHz)  $\delta$ : 7.90 (t,  $J = 5.5$  Hz, 1H), 7.50 (d,  $J = 8.3$  Hz, 2H), 7.45 (d,  $J = 8.2$  Hz, 2H), 6.78 (t,  $J = 5.4$  Hz, 1H), 4.06 (t,  $J = 7.1$  Hz, 2H), 3.50 (s, 4H), 3.43–3.37 (m, 4H), 3.20 (q,  $J = 5.8$  Hz, 2H), 3.06 (q,  $J = 6.0$  Hz, 2H), 2.61 (s, 3H), 2.54 (s, 3H), 2.45 (s, 3H), 2.14 (t,  $J = 7.6$  Hz, 2H), 1.97–1.89 (m, 2H), 1.38 (s, 9H).

Compounds **17a-e** were synthesized according to a similar procedure described for **16a-b**.

***N*-(2-(2-((3*r*,5*r*,7*r*)-Adamantan-1-yl)acetamido)ethyl)-4-(3,4-dimethyl-7-oxo-2-(*p*-tolyl)-2,7-dihydro-6*H*-pyrazolo[3,4-*d*]pyridazin-6-yl)butanamide (17a).** White solid (45.5 mg, 84.9% yield). <sup>1</sup>H-NMR (DMSO-*d*<sub>6</sub>, 600 MHz)  $\delta$ : 7.80 (s, 1H), 7.70 (s, 1H), 7.49 (d,  $J = 6.3$  Hz, 2H), 7.44 (d,  $J = 6.8$  Hz, 2H), 4.05 (t,  $J = 6.7$  Hz, 2H), 3.07 (s, 4H), 2.60 (s, 3H), 2.53 (s, 3H), 2.43 (s, 3H), 2.10 (t,  $J = 7.3$  Hz, 2H), 1.96–1.91 (m, 2H), 1.86 (s, 3H), 1.80 (s, 2H), 1.61–1.59 (m, 3H), 1.54–1.52 (m, 9H). <sup>13</sup>C NMR (DMSO-*d*<sub>6</sub>, 150 MHz)  $\delta$ : 172.1, 170.5, 155.7, 141.5, 139.8, 137.9, 136.3, 130.4, 126.2, 117.6, 50.6, 48.9, 42.5, 38.9, 38.6, 36.9, 33.0, 32.5, 28.5, 24.9, 21.2, 19.9, 12.3. HR-MS *m/z* Calcd. for C<sub>32</sub>H<sub>43</sub>N<sub>6</sub>O<sub>3</sub> [M+H]<sup>+</sup> 559.3392, Found 559.3423.

***N*-(4-(2-((3*r*,5*r*,7*r*)-Adamantan-1-yl)acetamido)butyl)-4-(3,4-dimethyl-7-oxo-2-(*p*-tolyl)-2,7-dihydro-6*H*-pyrazolo[3,4-*d*]pyridazin-6-yl)butanamide (17b).** White solid (18 mg, 11.8% yield). <sup>1</sup>H-NMR (DMSO-*d*<sub>6</sub>, 600 MHz)  $\delta$ : 7.78 (t, *J* = 5.4 Hz, 1H), 7.62 (t, *J* = 5.5 Hz, 1H), 7.48 (d, *J* = 8.4 Hz, 2H), 7.44 (d, *J* = 8.2 Hz, 2H), 4.04 (t, *J* = 7.0 Hz, 2H), 3.01 (dd, *J* = 11.2, 5.5 Hz, 4H), 2.60 (s, 3H), 2.52 (s, 3H), 2.43 (s, 3H), 2.10 (t, *J* = 7.6 Hz, 2H), 1.92 (dd, *J* = 14.7, 7.8 Hz, 2H), 1.88 (s, 3H), 1.79 (s, 2H), 1.62–1.61 (m, 3H), 1.55–1.53 (m, 9H), 1.37–1.36 (m, 4H) <sup>13</sup>C NMR (DMSO-*d*<sub>6</sub>, 150 MHz)  $\delta$ : 171.7, 170.2, 155.6, 141.6, 141.4, 139.8, 137.9, 136.3, 130.4, 126.15, 117.6, 50.5, 49.1, 42.6, 38.6, 36.9, 33.1, 32.6, 28.5, 27.2, 25.2, 21.2, 19.9, 12.3. HR-MS *m/z* Calcd. for C<sub>34</sub>H<sub>47</sub>N<sub>6</sub>O<sub>3</sub> [M+H]<sup>+</sup> 587.3705, Found 587.3721.

***N*-(6-(2-((3*r*,5*r*,7*r*)-Adamantan-1-yl)acetamido)hexyl)-4-(3,4-dimethyl-7-oxo-2-(*p*-tolyl)-2,7-dihydro-6*H*-pyrazolo[3,4-*d*]pyridazin-6-yl)butanamide (17c).** Light yellow oil (36 mg, 29% yield). <sup>1</sup>H-NMR (DMSO-*d*<sub>6</sub>, 600 MHz)  $\delta$ : 7.77 (t, *J* = 5.5 Hz, 1H), 7.62 (t, *J* = 5.4 Hz, 1H), 7.49 (d, *J* = 8.3 Hz, 2H), 7.44 (d, *J* = 8.2 Hz, 2H), 4.04 (t, *J* = 7.1 Hz, 2H), 3.01 (dt, *J* = 13.8, 6.8 Hz, 4H), 2.60 (s, 3H), 2.53 (s, 3H), 2.44 (s, 3H), 2.10 (t, *J* = 7.6 Hz, 2H), 1.93 (dd, *J* = 14.8, 7.5 Hz, 2H), 1.89 (s, 3H), 1.79 (s, 2H), 1.64–1.62 (m, 3H), 1.56–1.54 (m, 9H), 1.38–1.35 (m, 4H), 1.25–1.24 (m, 4H). <sup>13</sup>C NMR (DMSO-*d*<sub>6</sub>, 150 MHz)  $\delta$ : 171.7, 170.1, 155.6, 141.6, 141.4, 139.8, 137.8, 136.3, 130.3, 126.2, 117.6, 50.5, 49.1, 42.6, 38.8, 38.6, 36.9, 33.1, 32.6, 29.6, 28.5,

26.6, 25.15, 21.18, 19.86, 12.30. HR-MS  $m/z$  Calcd. for  $C_{36}H_{51}N_6O_3$   $[M+H]^+$  615.4018, Found 615.4023.

***N*-(8-(2-((3*r*,5*r*,7*r*)-Adamantan-1-yl)acetamido)octyl)-4-(3,4-dimethyl-7-oxo-2-(*p*-tolyl)-2,7-dihydro-6*H*-pyrazolo[3,4-*d*]pyridazin-6-yl)butanamide (17d).** Light yellow oil (42 mg, 40.6% yield).  $^1H$ -NMR (DMSO- $d_6$ , 600 MHz)  $\delta$ : 7.75 (t,  $J = 5.4$  Hz, 1H), 7.60 (d,  $J = 5.5$  Hz, 1H), 7.49 (d,  $J = 8.4$  Hz, 2H), 7.45 (d,  $J = 8.2$  Hz, 2H), 4.05 (t,  $J = 7.0$  Hz, 2H), 3.00 (dq,  $J = 9.6, 6.8$  Hz, 4H), 2.61 (s, 3H), 2.53 (s, 3H), 2.44 (s, 3H), 2.10 (t,  $J = 7.7$  Hz, 2H), 1.95–1.92 (m, 2H), 1.90 (s, 3H), 1.80 (s, 2H), 1.66–1.64 (m, 3H), 1.57–1.55 (m, 9H), 1.35–1.38 (m, 4H), 1.24 (s, 8H).  $^{13}C$  NMR (DMSO- $d_6$ , 150 MHz)  $\delta$ : 171.6, 170.1, 155.6, 141.6, 141.4, 139.8, 137.9, 136.3, 130.4, 126.2, 117.6, 50.6, 49.1, 42.6, 38.9, 38.6, 36.9, 33.1, 32.6, 29.6, 29.2, 28.5, 26.8, 25.2, 21.2, 19.8, 12.3. HR-MS  $m/z$  Calcd. for  $C_{38}H_{55}N_6O_3$   $[M+H]^+$  643.4331, Found 643.4354.

***N*-(2-(2-(2-(2-((3*r*,5*r*,7*r*)-Adamantan-1-yl)acetamido)ethoxy)ethoxy)ethyl)-4-(3,4-dimethyl-7-oxo-2-(*p*-tolyl)-2,7-dihydro-6*H*-pyrazolo[3,4-*d*]pyridazin-6-yl)butanamide (17e).** Yellow oil (49.2 mg, 64.7% yield).  $^1H$ -NMR (DMSO- $d_6$ , 600 MHz)  $\delta$ : 7.86 (t,  $J = 5.6$  Hz, 1H), 7.68 (t,  $J = 5.6$  Hz, 1H), 7.48 (d,  $J = 8.3$  Hz, 2H), 7.43 (d,  $J = 8.2$  Hz, 2H), 4.05–4.02 (m, 2H), 3.49 (s, 4H), 3.38 (dd,  $J = 13.3, 6.0$  Hz, 4H), 3.17 (dq,  $J = 15.2, 5.8$  Hz, 4H), 2.59 (s, 3H), 2.52 (s, 3H), 2.43 (s, 3H), 2.12 (t,  $J = 7.6$  Hz, 2H), 1.90–1.94 (m, 7.6 Hz, 2H), 1.88 (s, 3H), 1.80 (s, 2H), 1.63–1.61 (m, 3H), 1.55–

1.53 (m, 9H)  $^{13}\text{C}$  NMR (DMSO- $d_6$ , 150 MHz)  $\delta$ : 172.0, 170.4, 155.6, 141.6, 141.4, 139.8, 137.9, 136.4, 130.4, 126.2, 117.6, 69.9, 69.6, 60.2, 50.4, 49.0, 42.5, 38.9, 38.8, 36.9, 33.0, 32.6, 28.5, 25.1, 21.2, 19.9, 14.55, 12.3. HR-MS  $m/z$  Calcd. for  $\text{C}_{36}\text{H}_{51}\text{N}_6\text{O}_5$   $[\text{M}+\text{H}]^+$  647.3916, Found 647.3909.

**Methyl 7-(2-((3*r*,5*r*,7*r*)-adamantan-1-yl)acetamido)heptanoate (28)** This compound was synthesized according to a similar procedure described for **22a**.  $^1\text{H}$ -NMR (DMSO- $d_6$ , 600 MHz)  $\delta$ : 7.62 (t,  $J = 5.4$  Hz, 1H), 3.59 (s, 3H), 3.00 (dd,  $J = 12.7, 6.8$  Hz, 2H), 2.29 (t,  $J = 7.4$  Hz, 2H), 1.91 (s, 3H), 1.81 (s, 2H), 1.67–1.65 (m, 3H), 1.58–1.55 (m, 9H), 1.53–1.50 (m, 2H), 1.38–1.36 (m, 2H), 1.27–1.25 (m, 4H).

**7-(2-((3*r*,5*r*,7*r*)-Adamantan-1-yl)acetamido)heptanoic acid (29)**. This compound was synthesized according to a similar procedure described for **22a**.  $^1\text{H}$ -NMR (DMSO- $d_6$ , 600 MHz)  $\delta$ : 7.60 (s, 1H), 2.98 (dd,  $J = 12.8, 6.8$  Hz, 2H), 2.17 (t,  $J = 7.4$  Hz, 2H), 1.89 (s, 3H), 1.79 (s, 2H), 1.65–1.63 (m, 3H), 1.56–1.53 (m, 9H), 1.49–1.43 (m, 2H), 1.39–1.31 (m, 2H), 1.25–1.23 (m, 4H).

#### ***tert*-Butyl**

#### **(4-(7-(2-((3*r*,5*r*,7*r*)-adamantan-1-yl)acetamido)heptanamido)phenethyl)**

**carbamate (30)**. This compound was synthesized according to a similar procedure described for **23a**.  $^1\text{H}$ -NMR (DMSO- $d_6$ , 600 MHz)  $\delta$ : 9.77 (s, 1H), 7.62 (t,  $J = 5.4$  Hz, 1H), 7.49 (d,  $J = 8.4$  Hz, 2H), 7.09 (d,  $J = 8.4$  Hz, 2H), 6.83 (t,  $J = 5.4$  Hz, 1H), 3.10

(dd,  $J = 14.0, 6.5$  Hz, 2H), 3.01 (dd,  $J = 12.7, 6.7$  Hz, 2H), 2.63 (t,  $J = 7.5$  Hz, 2H), 2.27 (t,  $J = 7.4$  Hz, 2H), 1.91 (s, 3H), 1.81 (s, 2H), 1.66–1.64 (m, 3H), 1.58–1.56 (m, 12H), 1.37 (s, 9H), 1.30–1.27 (m, 5H).

**7-(2-((3*r*,5*r*,7*r*)-Adamantan-1-yl)acetamido)-*N*-(4-(2-(4-(3,4-dimethyl-7-oxo-2-(*p*-tolyl)-2,7-dihydro-6*H*-pyrazolo[3,4-*d*]pyridazin-6-yl)butanamido)ethyl)phenyl)heptanamide (17f).** White solid (45.3 mg, 27% yield). This compound was synthesized according to a similar procedure described for **16c**.  $^1\text{H-NMR}$  (DMSO- $d_6$ , 600 MHz)  $\delta$ : 9.78 (s, 1H), 7.88 (t,  $J = 5.2$  Hz, 1H), 7.64 (t,  $J = 5.2$  Hz, 1H), 7.48 (d,  $J = 8.1$  Hz, 4H), 7.44 (d,  $J = 7.7$  Hz, 2H), 7.10 (d,  $J = 8.0$  Hz, 2H), 4.03 (t,  $J = 6.6$  Hz, 2H), 3.22 (dd,  $J = 12.9, 6.7$  Hz, 2H), 3.00 (dd,  $J = 11.9, 5.9$  Hz, 2H), 2.63 (t,  $J = 7.0$  Hz, 2H), 2.59 (s, 3H), 2.53 (s, 3H), 2.43 (s, 3H), 2.26 (t,  $J = 7.3$  Hz, 2H), 2.10 (t,  $J = 7.3$  Hz, 2H), 1.94–1.91 (m, 2H), 1.90 (s, 3H), 1.80 (s, 2H), 1.65–1.63 (m, 3H), 1.56–1.54 (m, 11H), 1.38–1.37 (m, 2H), 1.28 (s, 4H).  $^{13}\text{C NMR}$  (DMSO- $d_6$ , 150 MHz)  $\delta$ : 171.8, 171.5, 170.1, 155.6, 141.6, 141.4, 139.8, 137.9, 136.4, 134.4, 130.4, 129.2, 126.2, 119.5, 117.6, 50.6, 49.0, 42.6, 40.7, 38.7, 36.9, 35.1, 33.1, 32.6, 29.5, 28.8, 28.5, 26.7, 25.6, 25.1, 21.2, 19.9, 12.3. HR-MS  $m/z$  Calcd. for  $\text{C}_{45}\text{H}_{60}\text{N}_7\text{O}_4$ .  $[\text{M}+\text{H}]^+$  762.4702, Found 762.4726.

### Fluorescence Polarization Assay

Determination of equilibrium dissociation constants  $K_i$  for each compound was performed using the fluorescence polarization assay with Atrovastatin-PEG3-FITC as ligand in black flat-bottom 96-well plates (Corning # 3993). A 2-fold serial dilution

of each compound (40  $\mu$ L) containing 0.2% DMSO was added to 40  $\mu$ L of a solution of fluorescent probe (50 nM final concentration) and 80 nM PDE $\delta$  protein in PBS-buffer (containing 0.05% Chaps, 0.4% DMSO). The fluorescence polarization value was measured on Biotek Synergy H2 with the 485 nm excitation and 535 nm emission filters after 2 h incubation at room temperature. The  $K_i$  of each compound tested was determined by fitting the displacement curves (AOBS, the experimentally measured anisotropy vs LT, the test compound concentration) to following equation using Origin (OriginPro 7, function codec from origin)

$$d = K_D + K_i + L_{ST} + L_T - R_T \quad (1)$$

$$e = (L_T - R_T) \times K_D + (L_{ST} - R_T) \times K_i + K_D \times K_i \quad (2)$$

$$f = -K_D \times K_i \times R_T \quad (3)$$

$$\theta = \cos^{-1} \left[ \frac{-2 \times d^3 + 9 \times d \times e - 27f}{2 \times \pm \sqrt{(d^2 - 3 \times e)^3}} \right] \quad (4)$$

$$F = \frac{2 \times \sqrt{d^2 - 3 \times e} \times \cos\left(\frac{\theta}{3}\right) - d}{3 \times K_{D1} + 2 \times \sqrt{d^2 - 3 \times e} \times \cos\left(\frac{\theta}{3}\right) - d} \quad (5)$$

$$A = \frac{Q \times F \times A_B + (1 - F) \times A_F}{1 - (1 - Q) \times F} \quad (6)$$

In these equations, Q is the ratio of the fluorescence intensity of the probe in the bound and free status, FSB is the fraction of bound probe, AB and AF represent the anisotropies of bound and free probe,  $K_D$  is the equilibrium dissociation constant of the fluorescent probe, LST is the concentration of probe, RT is the receptor S35 protein concentration, LT is total concentration of unlabeled small molecule competitor and  $K_i$  is the test compound's equilibrium dissociation constant.

## Western Blot.



The SW480 cells were cultivated ( $5.0 \times 10^5$  cells/well) on 6-well transparent plates. The test compounds were added following seeding after 24 h. The cells were incubated for another 24 h, and washed with cold PBS for 2 times. Then, 80  $\mu$ L of cold lysis buffer containing 1% protease and phosphatase inhibitors was added to the plates for 30 min on ice. The cell lysates were centrifuged for 12000 rpm for 15 min at 4 °C. The protein extract was denatured at 100 °C bath and protein concentration was measured by BCA protein assay. Equal amounts of protein (20  $\mu$ g) were separated and analyzed on 10–15% SDS-PAGE gels. The gels were transferred to PVDF membrane and blocked with 5% bovine serum albumin buffer for 2 h. The membranes were incubated with primary antibody overnight at 4 °C and washed with TBST three times. Then, the membranes were incubated with infrared secondary antibodies for 1 h. The immunoblots were scanned by LI-COR Odyssey infrared imaging system. The primary antibodies were: PDE $\delta$  (GeneTex, CTX109240, 1:1000), p-Ert (CST # 4370, 1:1000), p-Akt (CST # 4060, 1:1000), t-Akt (Epitomics # 2118, 1:10000), t-Erk (CST # 9107, 1:1000) and GAPDH (Abcam, ab8245).

### **The Molecular Docking Study.**

The crystal structure of PDE $\delta$  was obtained from protein database bank (PDB ID: 5E80) and prepared for docking using the protein preparation tool in Discovery Studio 3.0.2. During this process, the ligands and waters were removed and hydrogens were added to the structure. Staged minimization was performed with default setting. The docking studies were carried out using GOLD 5.0. Binding site was defined as whole

residues within a 10 Å radius subset encompassing the ligand. Conformations were generated by genetic algorithm and scored using GoldScore as fitness function. The best pose was chosen to explore the ligand–protein interaction. The image representing the best structure docking was prepared using PyMol 2.0.

#### **In Vitro Antitumor Assay.**

The test cancer cells (SW480, HCT116 and MIAPACA-2), which were in the logarithmic stage, were seeded in 96-well transparent plates at a density of  $6.5 \times 10^3$  cells per well and incubated in a cell incubator for 24 h. Test compounds were added onto 96-well plates with gradient concentrations and complete medium containing 0.1% DMSO for control. After incubated for 72 h, CCK8 (10 µL) was added to each well and the 96-well plate was incubated for 0.5–2 h. Finally, the absorbance (OD) was read on a Biotek Synergy H2 (Lab systems) at 450 nm and  $IC_{50}$  was calculated by Logit method. All experiments were performed at least three independent assays.

#### **Apoptosis Analysis by Flow Cytometry.**

SW480 cells ( $4.0 \times 10^5$  cells/well) were cultivated on six-well plates, and following treated with vehicle, compound **17c** (at 40 µM) and deltazinone (at 50 µM) for 24 h, respectively. Then, the cells were trypsinized and washed with cold PBS. After centrifugation and removal of the supernatants, the cells were resuspended in 1× binding buffer (300 µL). Treated with annexin V-FITC (5 µL) and PI (10 µL) in turn,

the stained cells were incubated at room temperature for 15 min in dark and measured by flow cytometer (BD Accuri C6).

The three independent assays for inhibiting the growth of MIAPACA-2

|                             | <b>1</b> | <b>17c</b> | <b>17d</b> |
|-----------------------------|----------|------------|------------|
| IC <sub>50</sub> ( $\mu$ M) | 45.36    | 21.5       | 73.37      |
|                             | 37.13    | 13.46      | 67.83      |
|                             | 127.6    | 52.66      | 15.2       |

The mean values of IC<sub>50</sub>  
**1** (IC<sub>50</sub>=41.2  $\pm$  4.1  $\mu$ M)  
**17c** (IC<sub>50</sub>=17.5  $\pm$  4.0  $\mu$ M)  
**17d** (IC<sub>50</sub>=70.6  $\pm$  2.8  $\mu$ M)

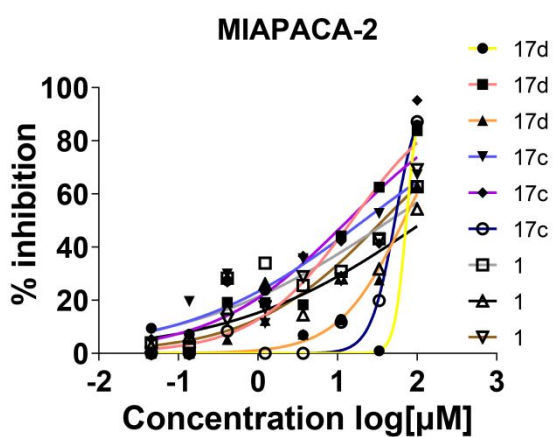

**Figure S1.** The anti-proliferative activities of test compounds against MIAPACA-2

## Spectral data

### Copies of the NMR and HRMS for representative compounds

#### Compound 15a

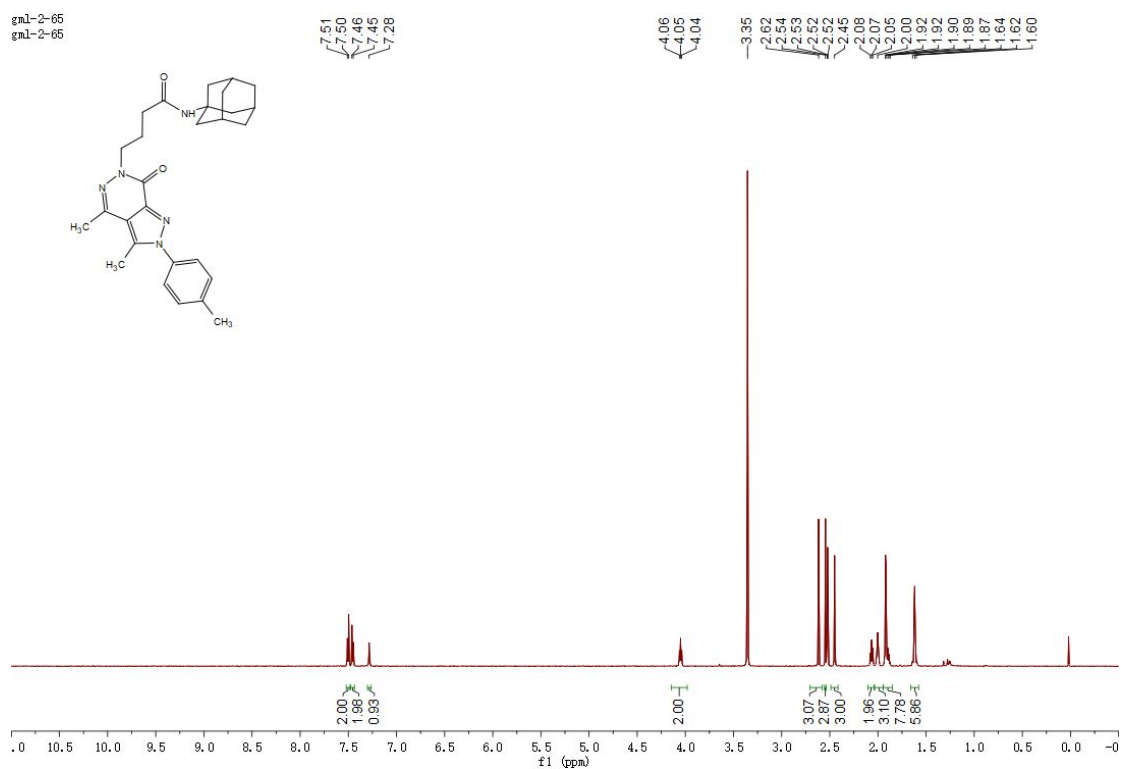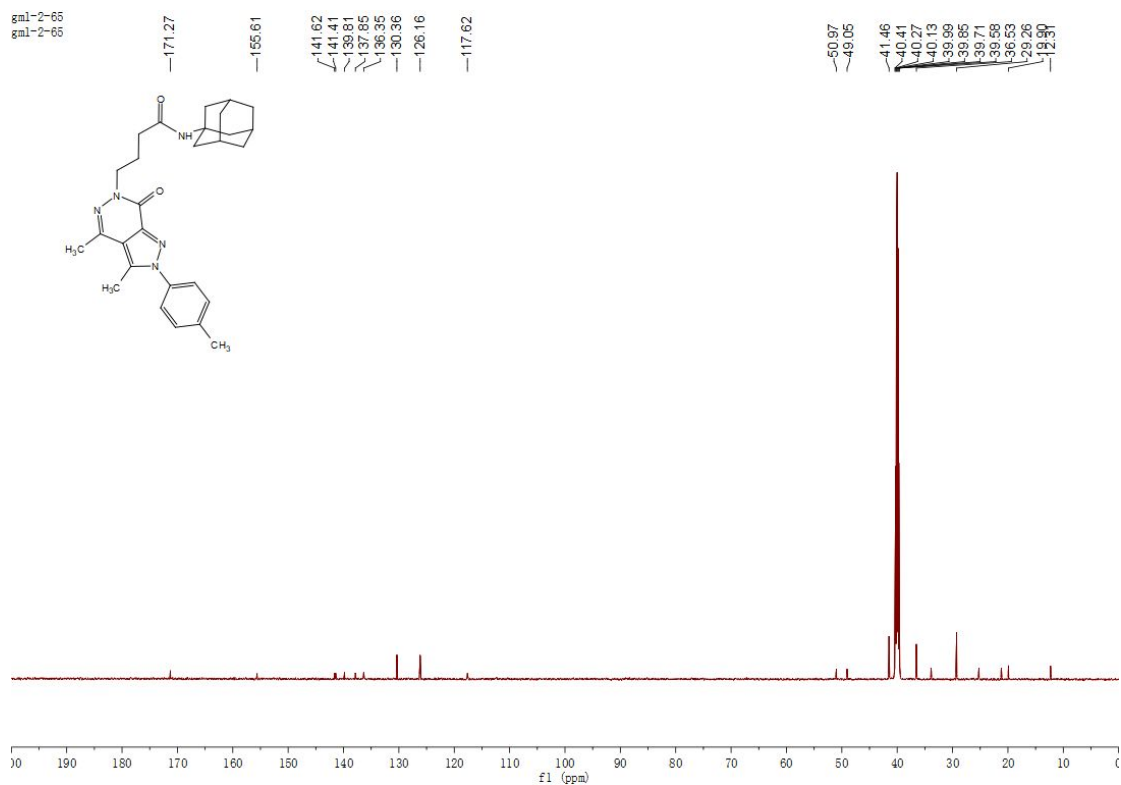

## 定性分析报告

|                        |                                               |              |                     |
|------------------------|-----------------------------------------------|--------------|---------------------|
| 数据文件名称                 | GML-2-65.d                                    | 样品名称         |                     |
| 样品类型                   | Sample                                        | 位置           | P1-C1               |
| 仪器名称                   | Instrument 1                                  | 用户名          |                     |
| 采集方法                   | SERUM-POS-15MIN.m                             | 采集时间         | 2021/12/14 11:33:43 |
| IRM 校正状态               | 成功                                            | DA 方法        | 123.m               |
| 注释                     |                                               |              |                     |
| 设备类型                   | QuadrupoleTimeOfFlight                        | Sample Group |                     |
| Info.                  |                                               | Stream Name  | LC 1                |
| Acquisition SW Version | 6200 series TOF/6500 series Q-TOF 10.1 (48.0) |              |                     |

### 用户质谱图

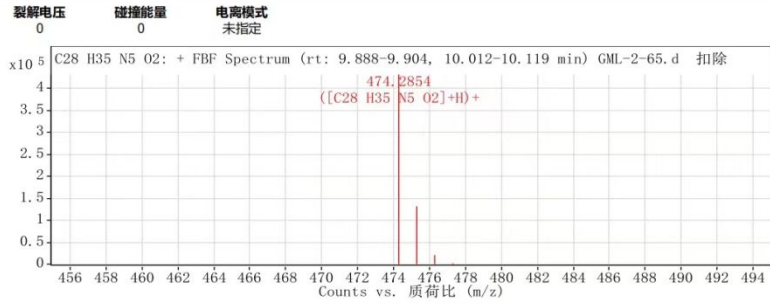

### 峰列表

| m/z      | z | 丰度        | 分子式           | 离子     |
|----------|---|-----------|---------------|--------|
| 474.2854 | 1 | 431936.75 | C28 H35 N5 O2 | (M+H)+ |
| 475.2886 | 1 | 131883.23 | C28 H35 N5 O2 | (M+H)+ |
| 476.2902 | 1 | 20734.84  | C28 H35 N5 O2 | (M+H)+ |
| 477.2922 | 1 | 2532.22   | C28H36N5O2    |        |
| 478.2934 | 1 | 323.09    | C28H36N5O2    |        |
| 497.2677 | 1 | 927.54    | C28H36N5O2    |        |
| 498.2692 | 1 | 136.51    | C28H36N5O2    |        |
| 513.2435 | 1 | 78.34     | C28H36N5O2    |        |

### 分子式计算器元素限制

| 元素 | 最小 | 最大 |
|----|----|----|
| C  | 3  | 28 |
| H  | 0  | 36 |
| O  | 0  | 2  |
| N  | 0  | 5  |

### 分子式计算器结果

| 分子式           | 最佳   | 质量       | 目标质量     | 差 (ppm) | 离子种类          | 分数    |
|---------------|------|----------|----------|---------|---------------|-------|
| C28 H35 N5 O2 | TRUE | 473.2781 | 473.2791 | 2.12    | C28 H36 N5 O2 | 97.06 |

--- 报告结束 ---

# Compound 15b

8m1-2-66  
8m1-2-66

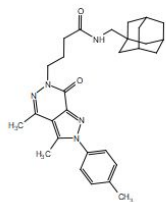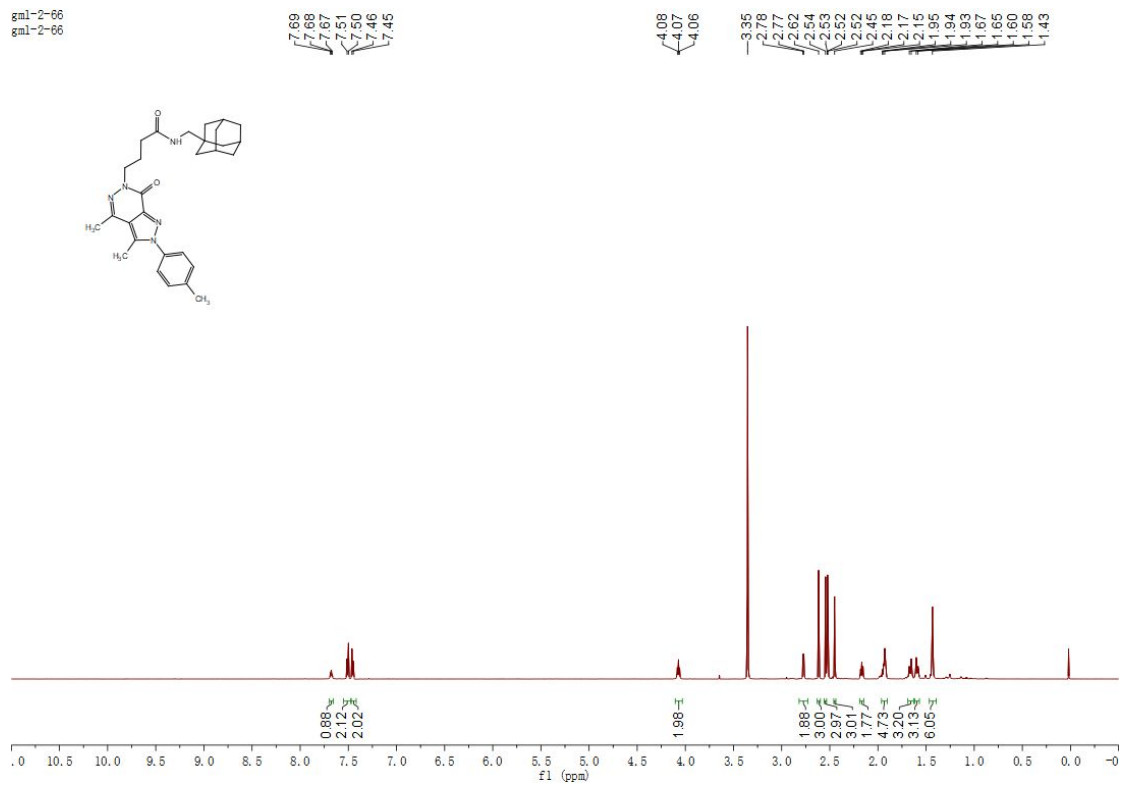

8m1-2-66  
8m1-2-66

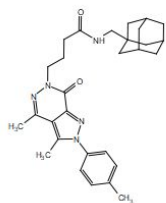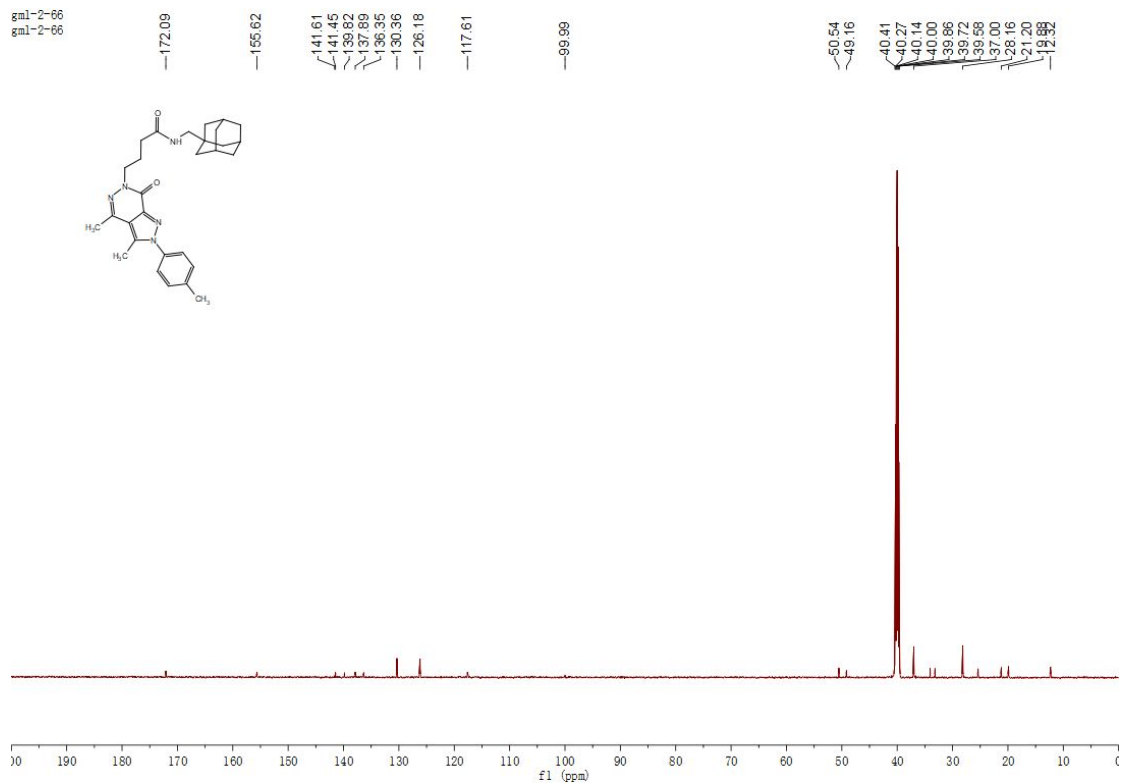

## 定性分析报告

|                        |                                               |              |                    |
|------------------------|-----------------------------------------------|--------------|--------------------|
| 数据文件名称                 | gml-2-66-N.d                                  | 样品名称         |                    |
| 样品类型                   | Sample                                        | 位置           | P1-B4              |
| 仪器名称                   | Instrument 1                                  | 用户名          |                    |
| 采集方法                   | MS-NEG.m                                      | 采集时间         | 2021/9/10 17:29:00 |
| IRM 校正状态               | 成功                                            | DA 方法        | Default.m          |
| 注释                     |                                               |              |                    |
| 设备类型                   | QuadrupoleTimeOfFlight                        | Sample Group |                    |
| Info.                  |                                               | Stream Name  | LC 1               |
| Acquisition SW Version | 6200 series TOF/6500 series Q-TOF 10.1 (48.0) |              |                    |

### 用户色谱图

裂解电压 120 碰撞能量 0 电离模式 ESI

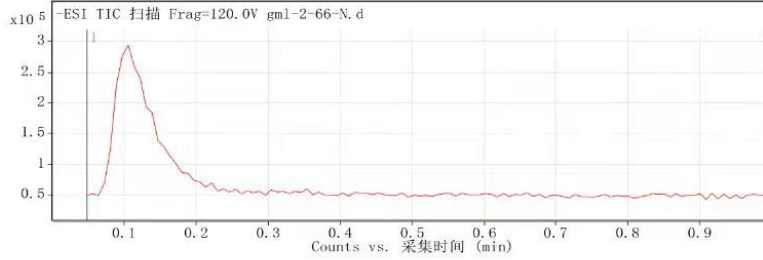

### 用户质谱图

裂解电压 120 碰撞能量 0 电离模式 ESI

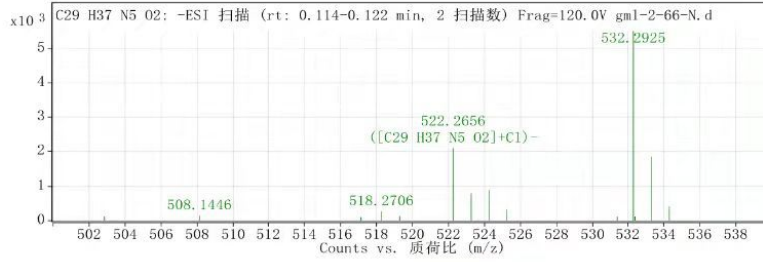

### 峰列表

| m/z      | z | 丰度        |
|----------|---|-----------|
| 112.9862 |   | 4860.19   |
| 144.9657 |   | 149466.89 |
| 242.1776 | 1 | 3822.93   |
| 255.2324 | 1 | 2611.69   |
| 283.2641 | 1 | 4115.61   |
| 312.9195 |   | 7444.28   |
| 375.2759 | 1 | 2431.58   |
| 403.305  | 1 | 3396.3    |
| 532.2925 | 1 | 5502.57   |
| 966.0007 | 1 | 8693.76   |

### 分子式计算器元素限制

| 元素 | 最小 | 最大 |
|----|----|----|
| C  | 3  | 60 |

# Compound 16a

8ml-2-21-IV-1  
8ml-2-21-IV-1

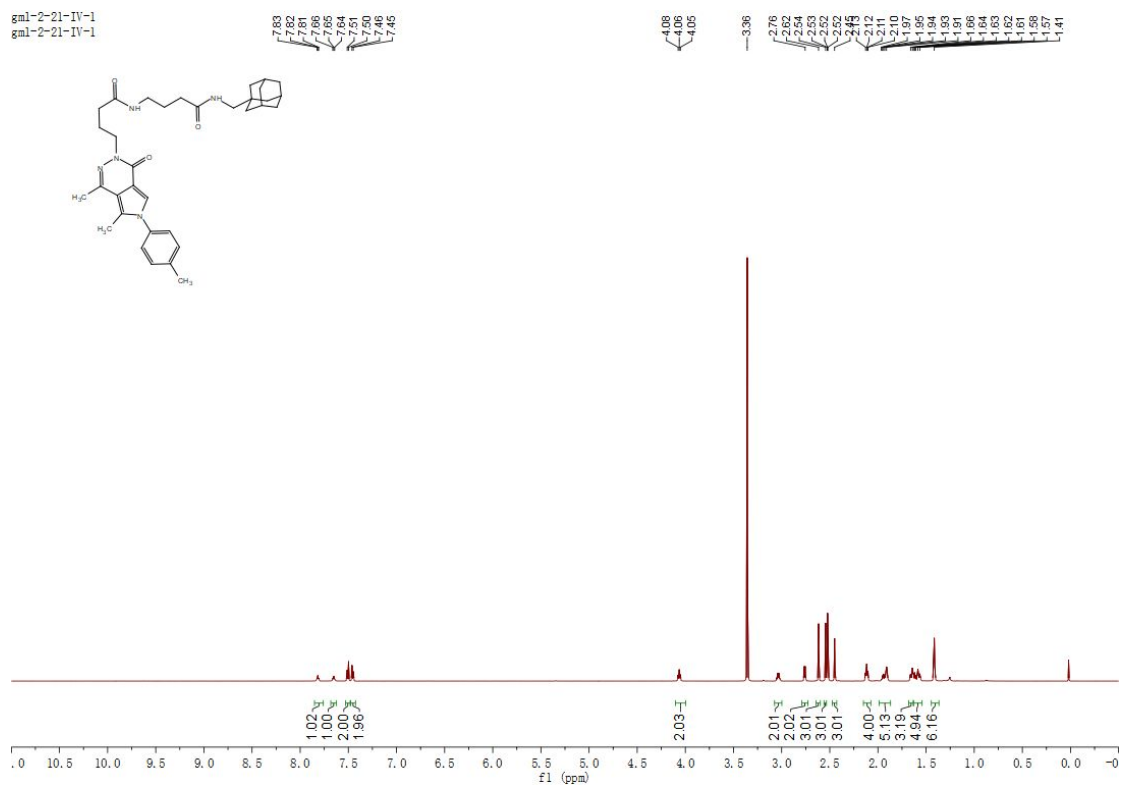

8ml-2-21-IV-1  
8ml-2-21-IV-1

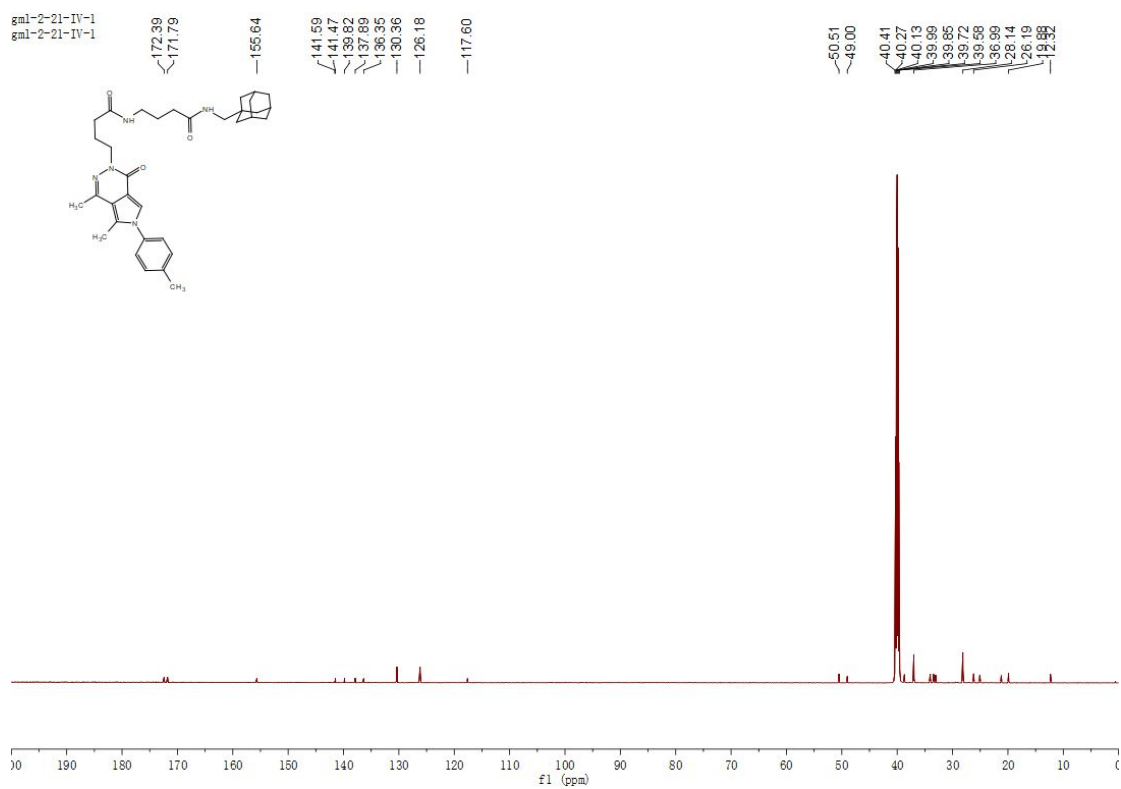



## Qualitative Analysis Report

|                        |               |               |                                   |
|------------------------|---------------|---------------|-----------------------------------|
| Data Filename          | GML-2-21-IV.d | Sample Name   |                                   |
| Sample Type            | Sample        | Position      | P1-B4                             |
| Instrument Name        | Instrument 1  | User Name     |                                   |
| Acq Method             | MS-POS.m      | Acquired Time | 12/17/2020 9:51:56 AM (UTC+08:00) |
| IRM Calibration Status | Success       | DA Method     | mz-300.m                          |
| Comment                |               |               |                                   |

|                        |                                               |                          |                                   |
|------------------------|-----------------------------------------------|--------------------------|-----------------------------------|
| Sample Group           |                                               | Info.                    |                                   |
| Stream Name            | LC 1                                          | Acquisition Time (Local) | 12/17/2020 9:51:56 AM (UTC+08:00) |
| Acquisition SW Version | 6200 series TOF/6500 series Q-TOF 10.1 (48.0) | QTOF Driver Version      | 10.01.00                          |
| QTOF Firmware Version  | 9.808                                         | Tune Mass Range Max.     | 3200                              |

### Spectra

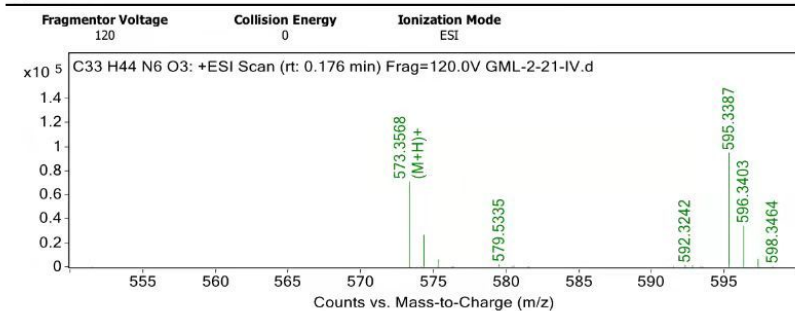

#### Peak List

| m/z       | z | Abund    | Formula       | Ion    |
|-----------|---|----------|---------------|--------|
| 338.341   |   | 3004.55  |               |        |
| 573.3568  | 1 | 71008.09 | C33 H44 N6 O3 | (M+H)+ |
| 574.3583  | 1 | 26773.11 | C33 H44 N6 O3 | (M+H)+ |
| 575.3592  | 1 | 6295.09  | C33 H44 N6 O3 | (M+H)+ |
| 595.3387  | 1 | 94957.54 |               |        |
| 596.3403  | 1 | 34375.99 |               |        |
| 597.3414  | 1 | 6775.13  |               |        |
| 611.3156  | 1 | 2640.21  |               |        |
| 922.0098  |   | 2543.94  |               |        |
| 1167.6796 | 1 | 2321.51  |               |        |

#### Formula Calculator Element Limits

| Element | Min | Max |
|---------|-----|-----|
| C       | 3   | 60  |
| H       | 0   | 120 |
| O       | 0   | 5   |
| N       | 0   | 6   |
| S       | 0   | 0   |
| Cl      | 0   | 0   |

#### Formula Calculator Results

| Formula | Best | Mass | Tgt Mass | Diff (ppm) | Ion Species | Score |
|---------|------|------|----------|------------|-------------|-------|
|         |      |      |          |            |             |       |

# Compound 16b

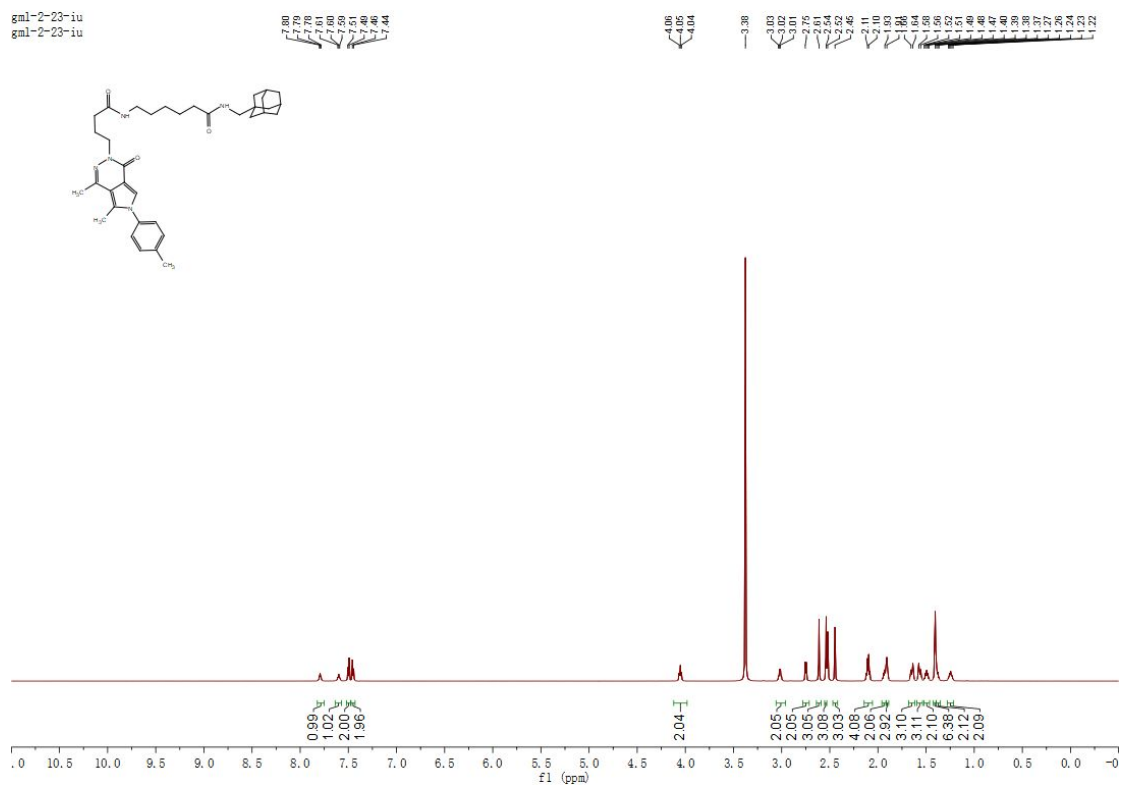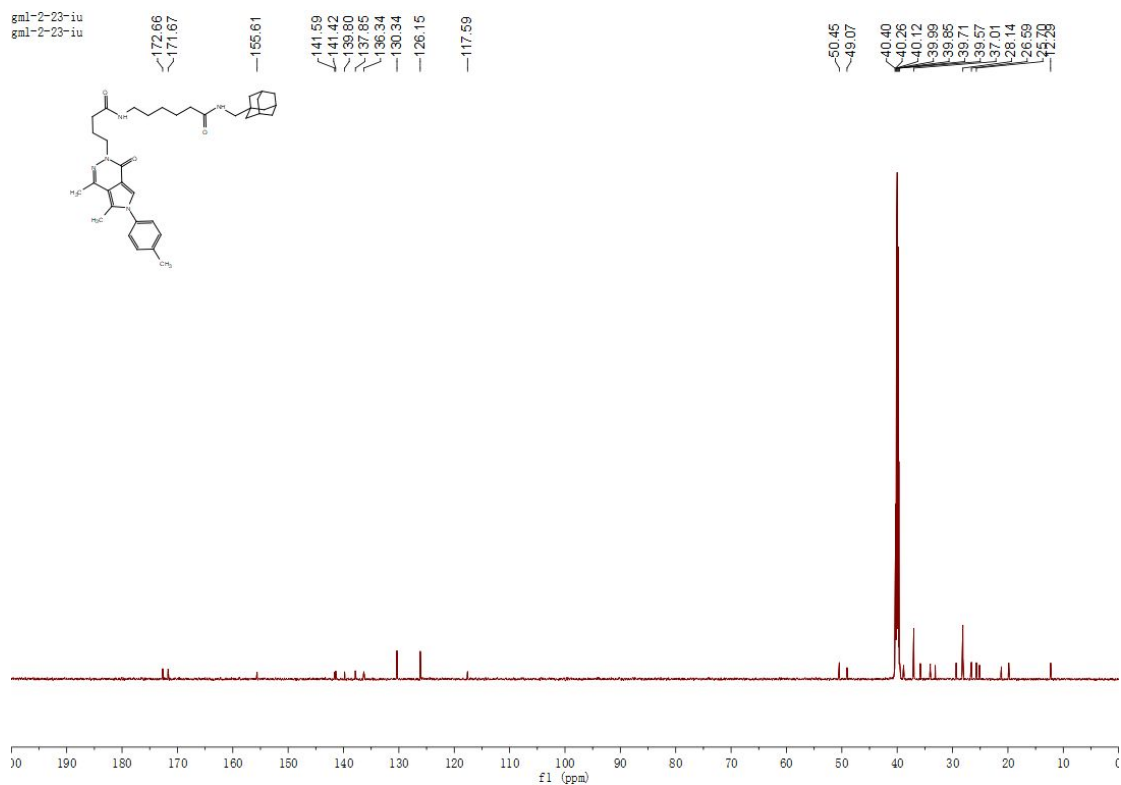

## Qualitative Analysis Report

|                        |               |               |                                   |
|------------------------|---------------|---------------|-----------------------------------|
| Data Filename          | GML-2-23-IV.d | Sample Name   |                                   |
| Sample Type            | Sample        | Position      | P1-B5                             |
| Instrument Name        | Instrument 1  | User Name     |                                   |
| Acq Method             | MS-POS.m      | Acquired Time | 12/17/2020 9:53:36 AM (UTC+08:00) |
| IRM Calibration Status | Success       | DA Method     | mz-300.m                          |

|                        |                                               |                          |                                   |
|------------------------|-----------------------------------------------|--------------------------|-----------------------------------|
| Sample Group           |                                               | Info.                    |                                   |
| Stream Name            | LC 1                                          | Acquisition Time (Local) | 12/17/2020 9:53:36 AM (UTC+08:00) |
| Acquisition SW Version | 6200 series TOF/6500 series Q-TOF 10.1 (48.0) | QTOF Driver Version      | 10.01.00                          |
| QTOF Firmware Version  | 9.808                                         | Tune Mass Range Max.     | 3200                              |

### Spectra

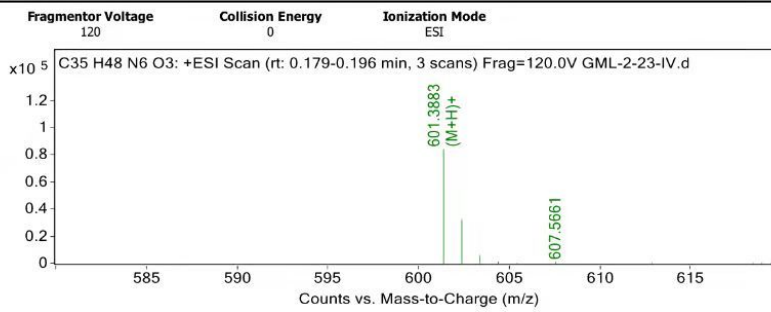

#### Peak List

| m/z      | z | Abund    | Formula       | Ion    |
|----------|---|----------|---------------|--------|
| 320.1718 | 2 | 8814.32  |               |        |
| 338.3408 | 1 | 6700.1   |               |        |
| 601.3883 | 1 | 84069.01 | C35 H48 N6 O3 | (M+H)+ |
| 602.3902 | 1 | 32515.74 | C35 H48 N6 O3 | (M+H)+ |
| 603.3918 | 1 | 6145.97  | C35 H48 N6 O3 | (M+H)+ |
| 620.3584 | 2 | 6496.31  |               |        |
| 620.8624 | 2 | 4566.75  |               |        |
| 623.3698 | 1 | 97130.84 |               |        |
| 624.3716 | 1 | 36905.13 |               |        |
| 625.3729 | 1 | 6794.59  |               |        |

#### Formula Calculator Element Limits

| Element | Min | Max |
|---------|-----|-----|
| C       | 3   | 60  |
| H       | 0   | 120 |
| O       | 0   | 5   |
| N       | 0   | 6   |
| S       | 0   | 0   |
| Cl      | 0   | 0   |

#### Formula Calculator Results

| Formula | Best | Mass | Tgt Mass | Diff (ppm) | Ion Species | Score |
|---------|------|------|----------|------------|-------------|-------|
|         |      |      |          |            |             |       |

# Compound 16c

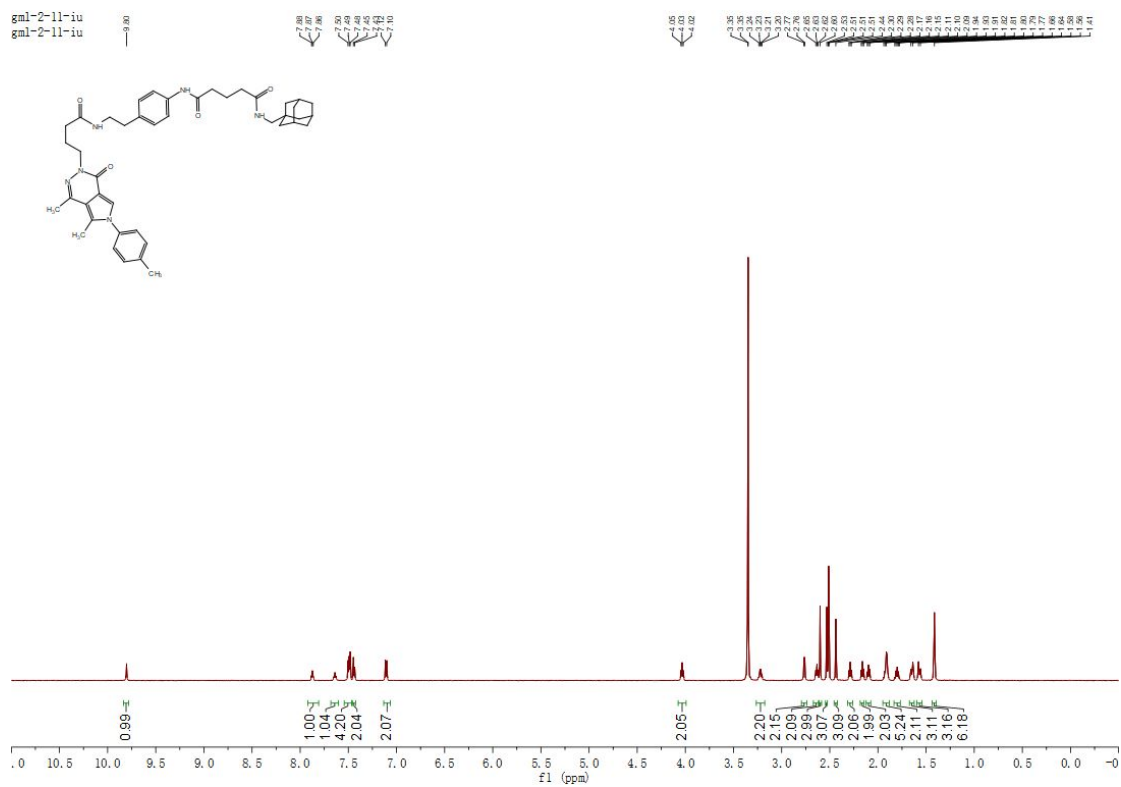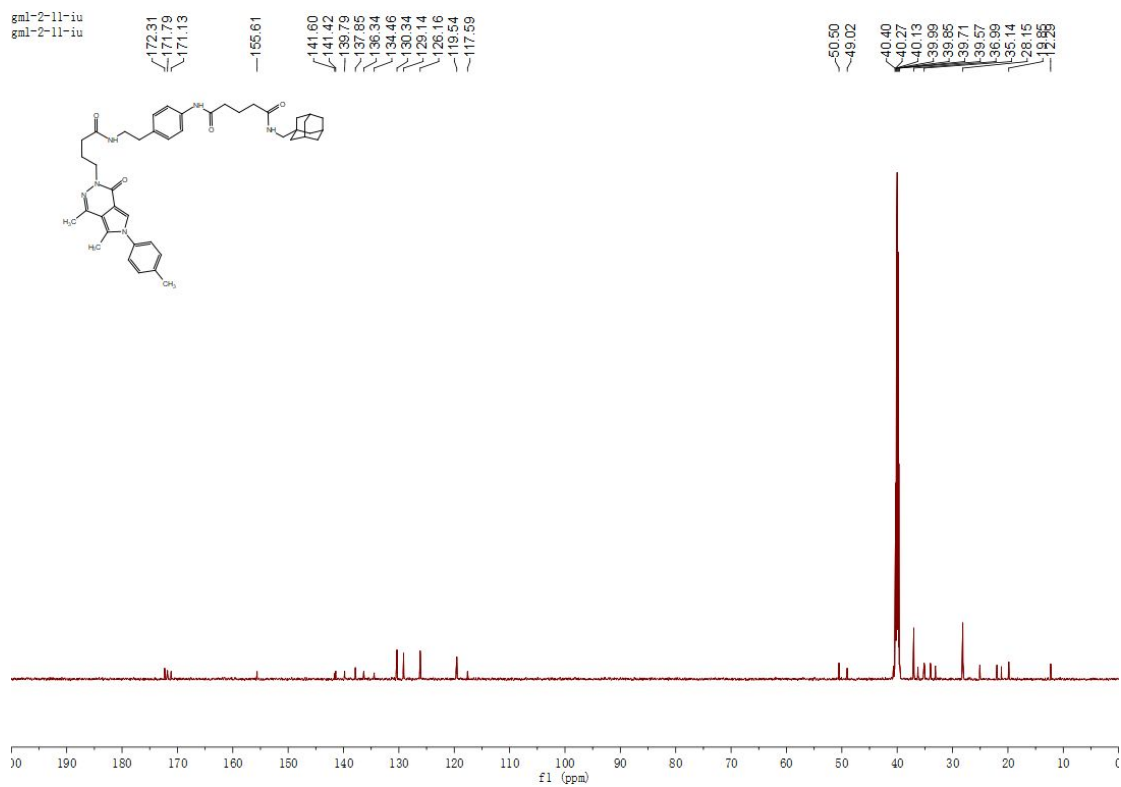



# Compound 16d

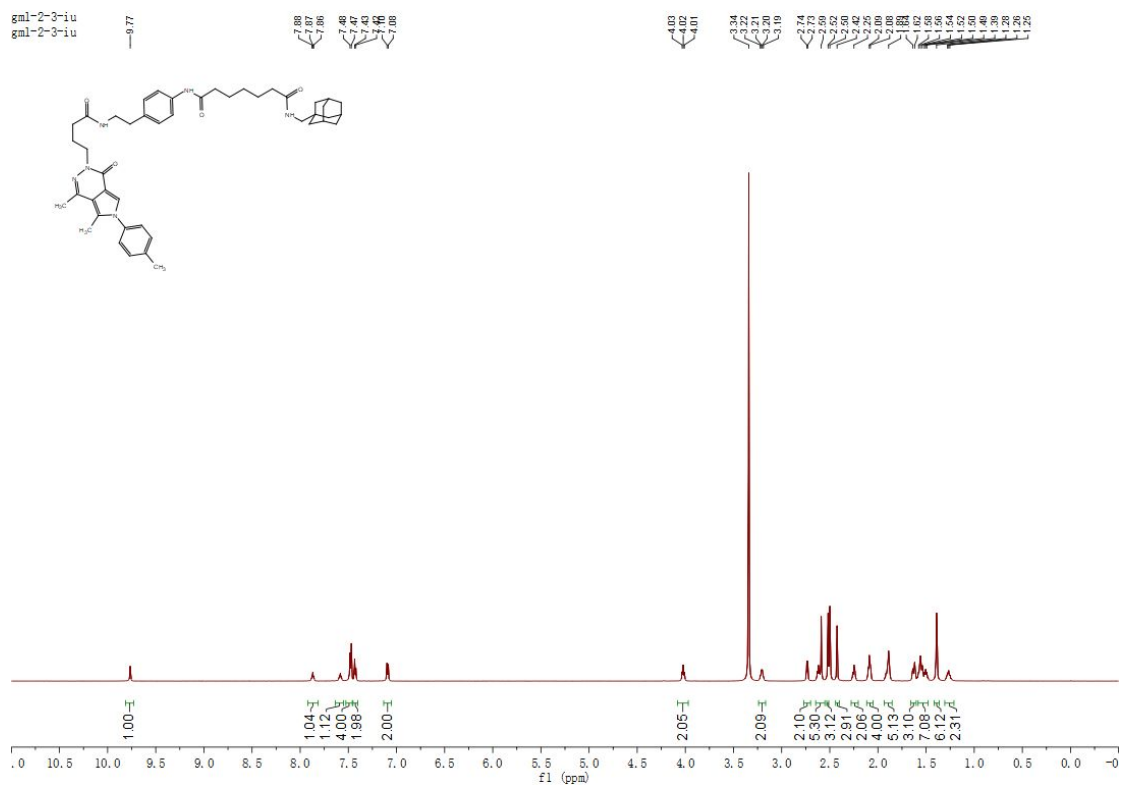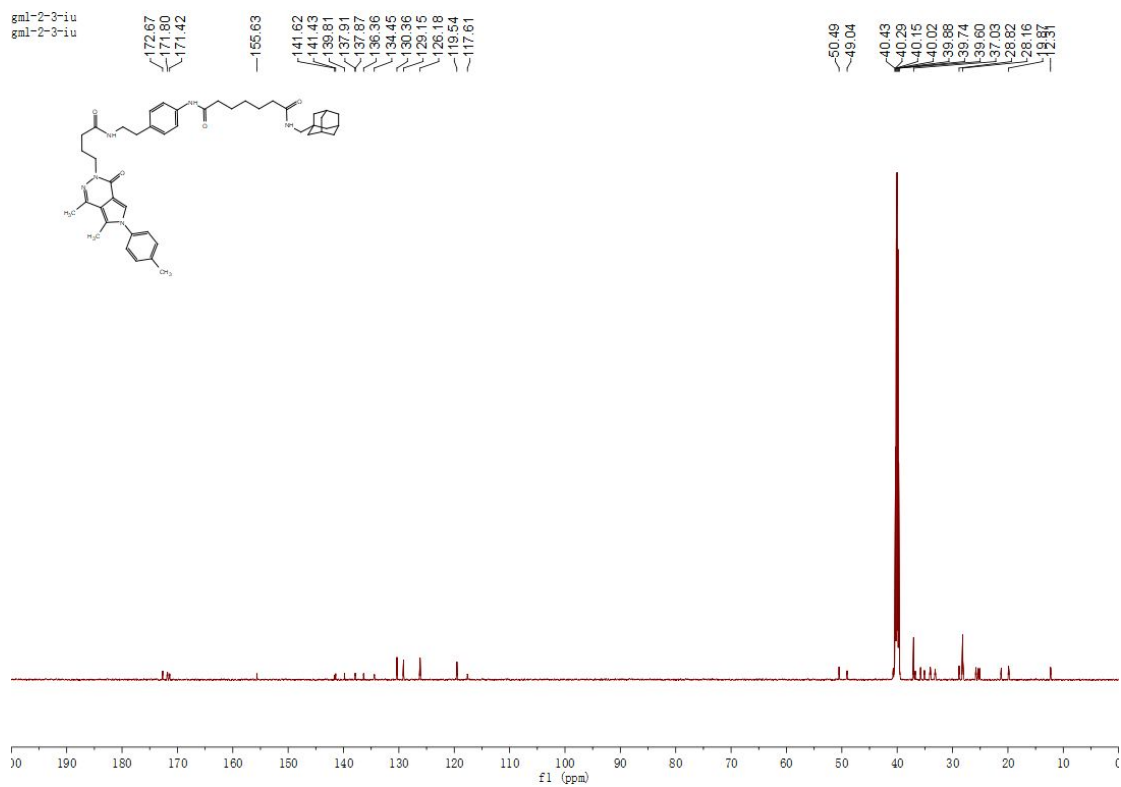

## Qualitative Analysis Report

|                               |              |                      |                                   |
|-------------------------------|--------------|----------------------|-----------------------------------|
| <b>Data Filename</b>          | gml-2-3-IV.d | <b>Sample Name</b>   |                                   |
| <b>Sample Type</b>            | Sample       | <b>Position</b>      | P1-A9                             |
| <b>Instrument Name</b>        | Instrument 1 | <b>User Name</b>     |                                   |
| <b>Acq Method</b>             | MS-POS.m     | <b>Acquired Time</b> | 12/3/2020 10:57:18 AM (UTC+08:00) |
| <b>IRM Calibration Status</b> | Success      | <b>DA Method</b>     | mz-300.m                          |

|                               |                                               |                                 |                                   |
|-------------------------------|-----------------------------------------------|---------------------------------|-----------------------------------|
| <b>Sample Group</b>           |                                               | <b>Info.</b>                    |                                   |
| <b>Stream Name</b>            | LC 1                                          | <b>Acquisition Time (Local)</b> | 12/3/2020 10:57:18 AM (UTC+08:00) |
| <b>Acquisition SW Version</b> | 6200 series TOF/6500 series Q-TOF 10.1 (48.0) | <b>QTOF Driver Version</b>      | 10.01.00                          |
| <b>QTOF Firmware Version</b>  | 9.808                                         | <b>Tune Mass Range Max.</b>     | 3200                              |

### Spectra

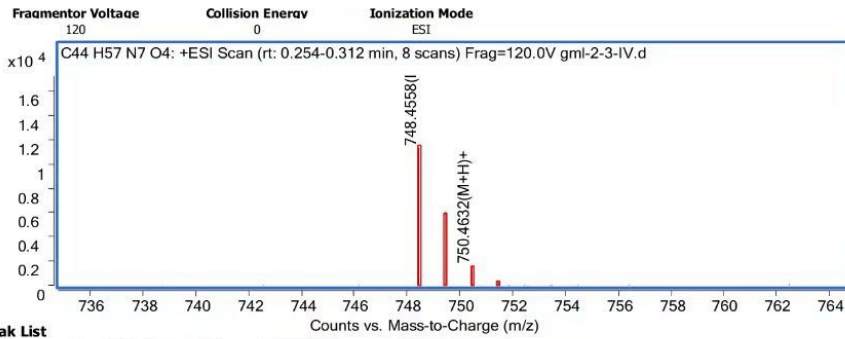

| m/z      | z | Abund    | Formula       | Ion    |
|----------|---|----------|---------------|--------|
| 121.0509 |   | 5265.37  |               |        |
| 130.1589 |   | 3874.49  |               |        |
| 141.1136 | 1 | 23441.35 |               |        |
| 374.7345 | 2 | 6719.99  |               |        |
| 748.4558 | 1 | 11309.09 | C44 H57 N7 O4 | (M+H)+ |
| 749.46   | 1 | 6078.86  | C44 H57 N7 O4 | (M+H)+ |
| 770.4377 | 1 | 29860.83 |               |        |
| 771.4408 | 1 | 14892.37 |               |        |
| 772.443  | 1 | 3855.94  |               |        |
| 922.0098 | 1 | 5247.64  |               |        |

#### Formula Calculator Element Limits

| Element | Min | Max |
|---------|-----|-----|
| C       | 3   | 60  |
| H       | 0   | 120 |
| O       | 4   | 4   |
| N       | 7   | 7   |
| S       | 0   | 0   |

# Compound 16e

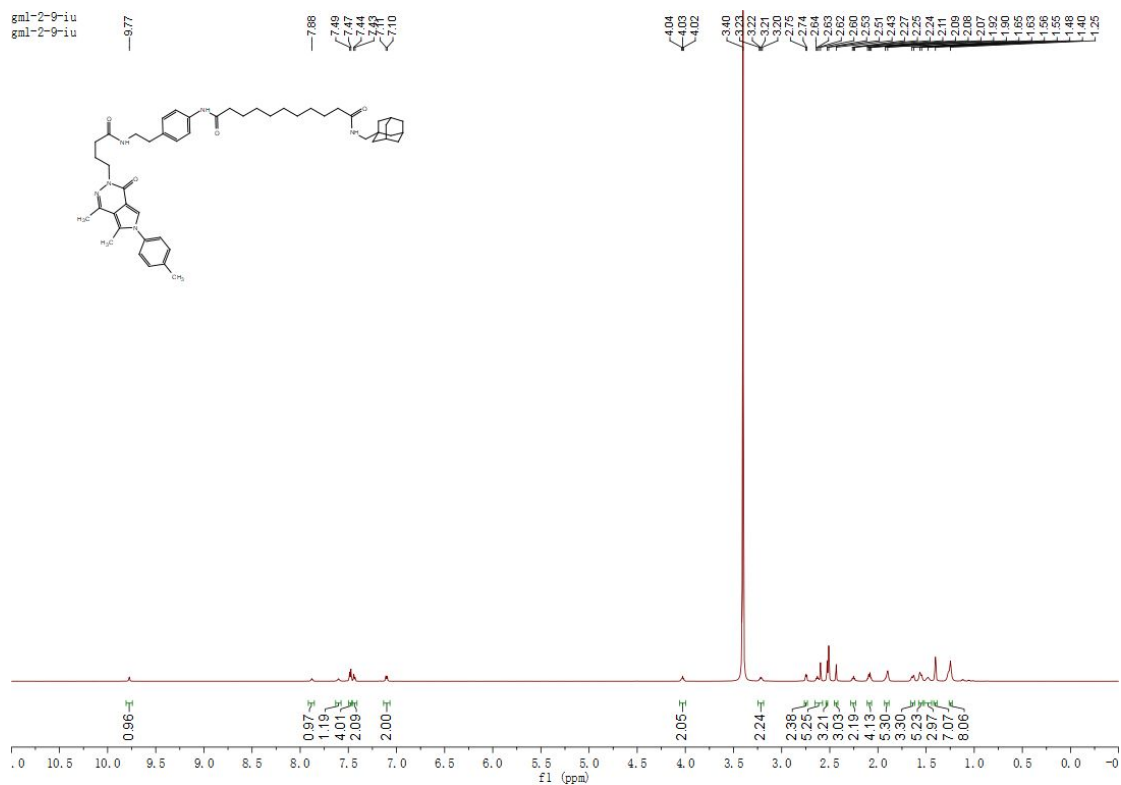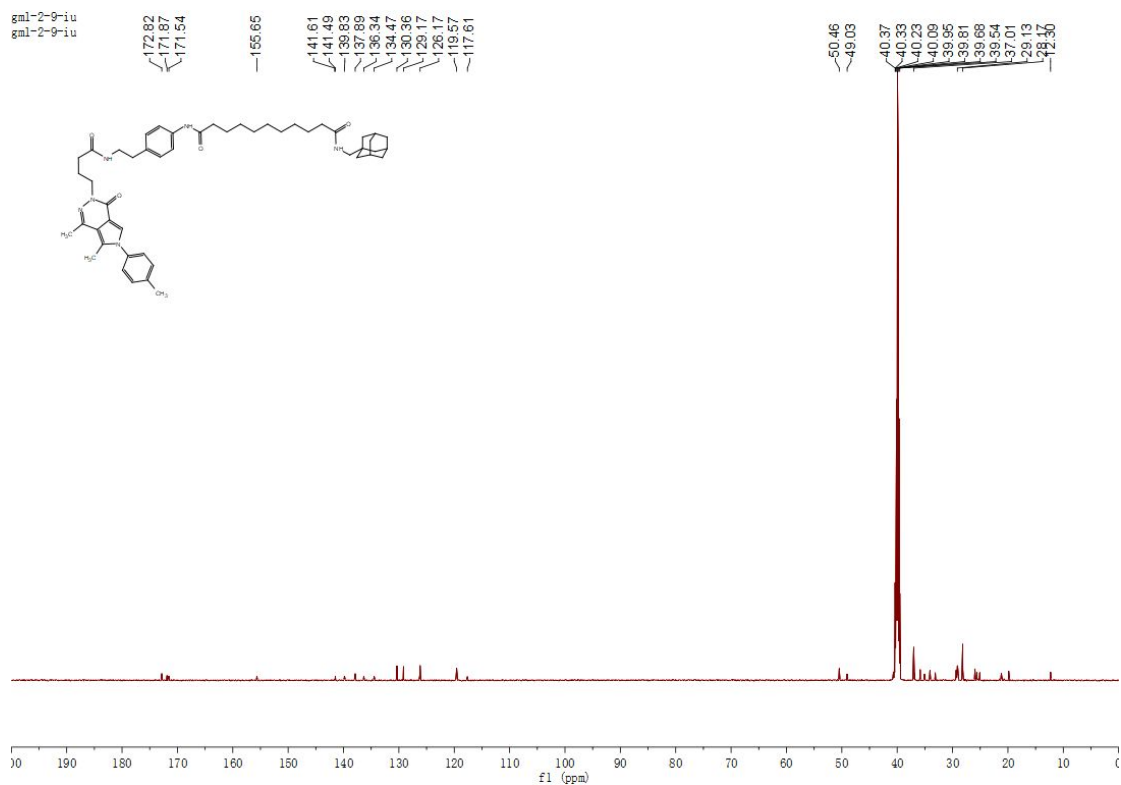



## Qualitative Analysis Report

|                               |              |                      |                                   |
|-------------------------------|--------------|----------------------|-----------------------------------|
| <b>Data Filename</b>          | gml-2-9-IV.d | <b>Sample Name</b>   |                                   |
| <b>Sample Type</b>            | Sample       | <b>Position</b>      | P1-B1                             |
| <b>Instrument Name</b>        | Instrument 1 | <b>User Name</b>     |                                   |
| <b>Acq Method</b>             | MS-POS.m     | <b>Acquired Time</b> | 12/3/2020 10:58:59 AM (UTC+08:00) |
| <b>IRM Calibration Status</b> | Success      | <b>DA Method</b>     | mz-300.m                          |
| <b>Comment</b>                |              |                      |                                   |

|                               |                                               |                                 |                                   |
|-------------------------------|-----------------------------------------------|---------------------------------|-----------------------------------|
| <b>Sample Group</b>           |                                               | <b>Info.</b>                    |                                   |
| <b>Stream Name</b>            | LC 1                                          | <b>Acquisition Time (Local)</b> | 12/3/2020 10:58:59 AM (UTC+08:00) |
| <b>Acquisition SW Version</b> | 6200 series TOF/6500 series Q-TOF 10.1 (48.0) | <b>QTOF Driver Version</b>      | 10.01.00                          |
| <b>QTOF Firmware Version</b>  | 9.808                                         | <b>Tune Mass Range Max.</b>     | 3200                              |

### Spectra

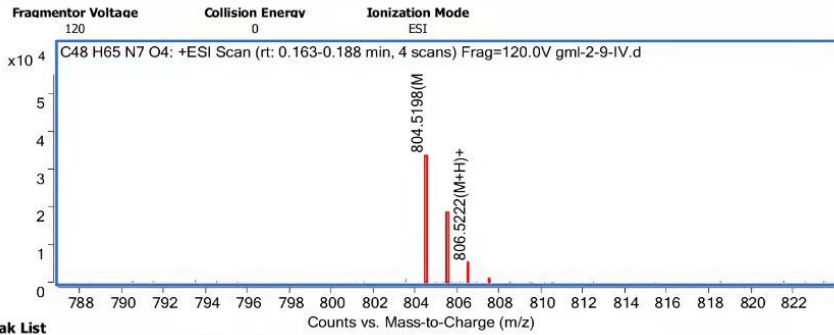

### Peak List

| m/z      | z | Abund    | Formula       | Ion    |
|----------|---|----------|---------------|--------|
| 141.114  | 1 | 16748.61 |               |        |
| 402.7649 | 2 | 15467.37 |               |        |
| 433.3804 | 1 | 18285.81 |               |        |
| 447.396  | 1 | 17517.19 |               |        |
| 580.4607 | 1 | 17402.95 |               |        |
| 804.5198 | 1 | 33636.29 | C48 H65 N7 O4 | (M+H)+ |
| 805.5205 | 1 | 18349.43 | C48 H65 N7 O4 | (M+H)+ |
| 826.5008 | 1 | 84612.23 |               |        |
| 827.5037 | 1 | 44429.85 |               |        |
| 828.5035 | 1 | 12282.5  |               |        |

### Formula Calculator Element Limits

| Element | Min | Max |
|---------|-----|-----|
| C       | 3   | 60  |
| H       | 0   | 120 |
| O       | 4   | 4   |
| N       | 7   | 7   |
| S       | 0   | 0   |

# Compound 17a

gml-1-167-iu-01  
gml-1-167-iu-01

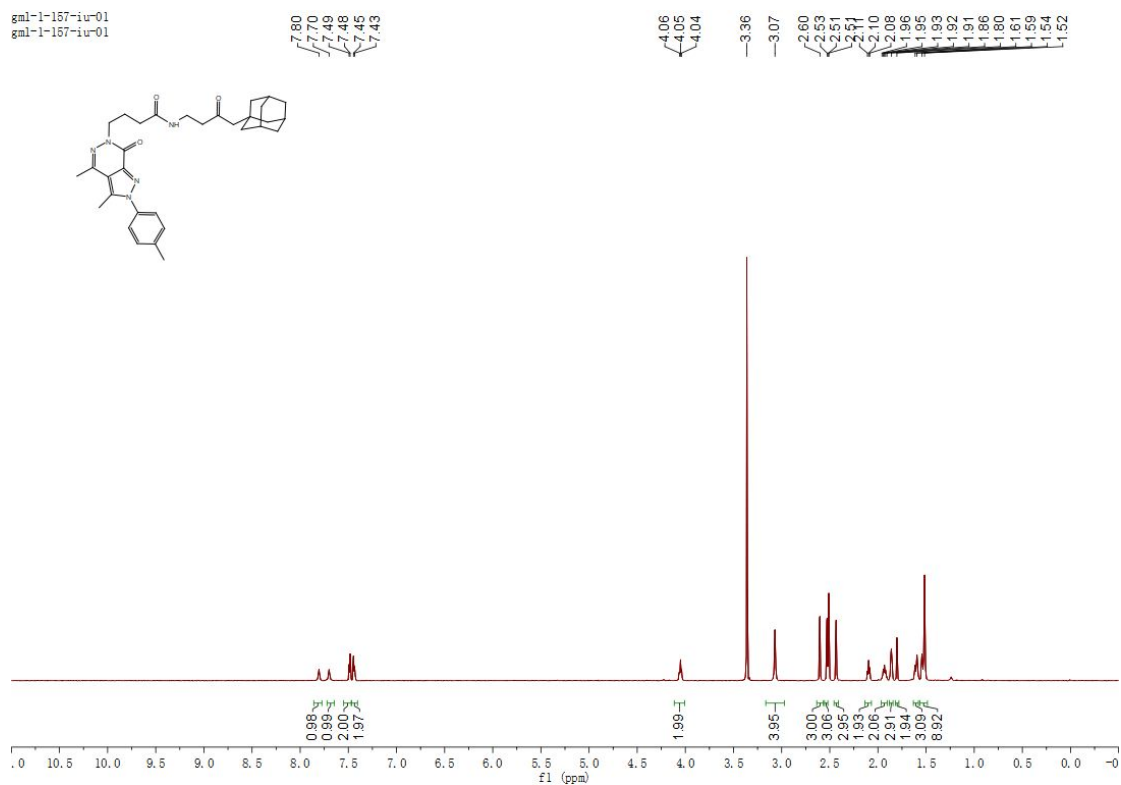

gml-1-167-iu-01  
gml-1-167-iu-01

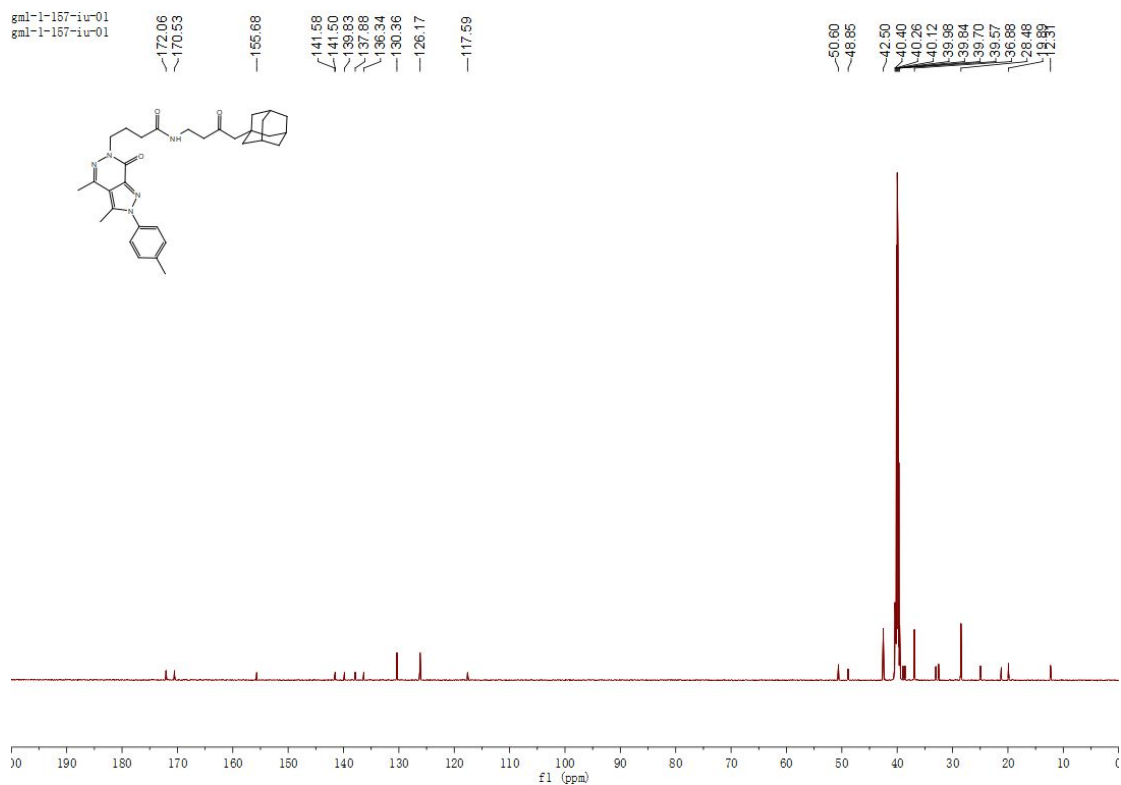

## 定性分析报告

|                        |                                               |              |                    |
|------------------------|-----------------------------------------------|--------------|--------------------|
| 数据文件名称                 | GML-1-157-IV.d                                | 样品名称         |                    |
| 样品类型                   | Sample                                        | 位置           | P1-A9              |
| 仪器名称                   | Instrument 1                                  | 用户名          |                    |
| 采集方法                   | MS-POS.m                                      | 采集时间         | 2020/9/21 10:00:17 |
| IRM 校正状态               | 成功                                            | DA 方法        | Default.m          |
| <b>注释</b>              |                                               |              |                    |
| 设备类型                   | QuadrupoleTimeOfFlight                        | Sample Group |                    |
| Info.                  |                                               | Stream Name  | LC 1               |
| Acquisition SW Version | 6200 series TOF/6500 series Q-TOF 10.1 (48.0) |              |                    |

### 用户色谱图

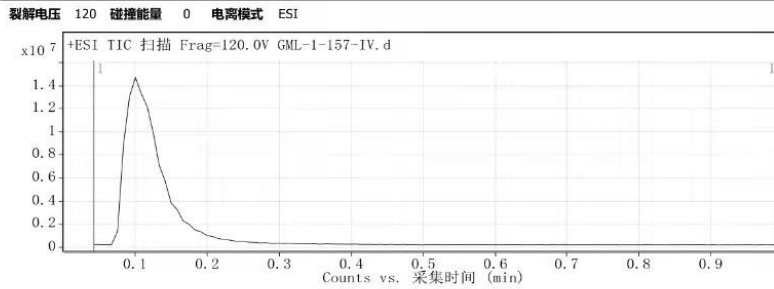

### 用户质谱图

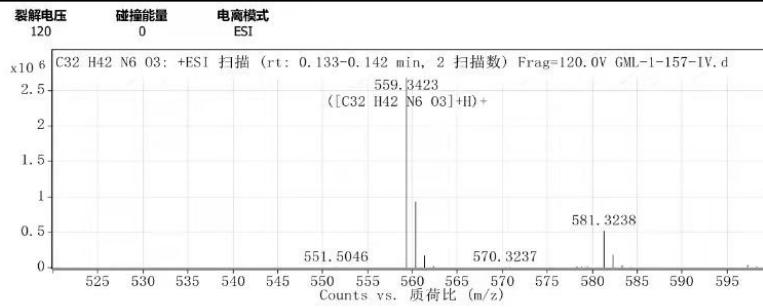

### 峰列表

| m/z       | z | 丰度        | 分子式           | 离子     |
|-----------|---|-----------|---------------|--------|
| 338.3426  | 1 | 100284.5  |               |        |
| 559.3423  | 1 | 2678648   | C32 H42 N6 O3 | (M+H)+ |
| 560.3451  | 1 | 931370.63 | C32 H42 N6 O3 | (M+H)+ |
| 561.3481  | 1 | 172290.69 | C32 H42 N6 O3 | (M+H)+ |
| 581.3238  | 1 | 518739.31 |               |        |
| 582.3276  | 1 | 182687.94 |               |        |
| 597.2967  | 1 | 41374.18  |               |        |
| 1139.6584 | 1 | 304473.22 |               |        |
| 1140.6612 | 1 | 226944.97 |               |        |
| 1141.6626 | 1 | 82426.88  |               |        |

分子式计算器元素限制

| 元素 | 最小 | 最大 |
|----|----|----|
| C  | 3  | 60 |

# Compound 17b

8ml 1-17-iu H C  
8ml 1-17-iu

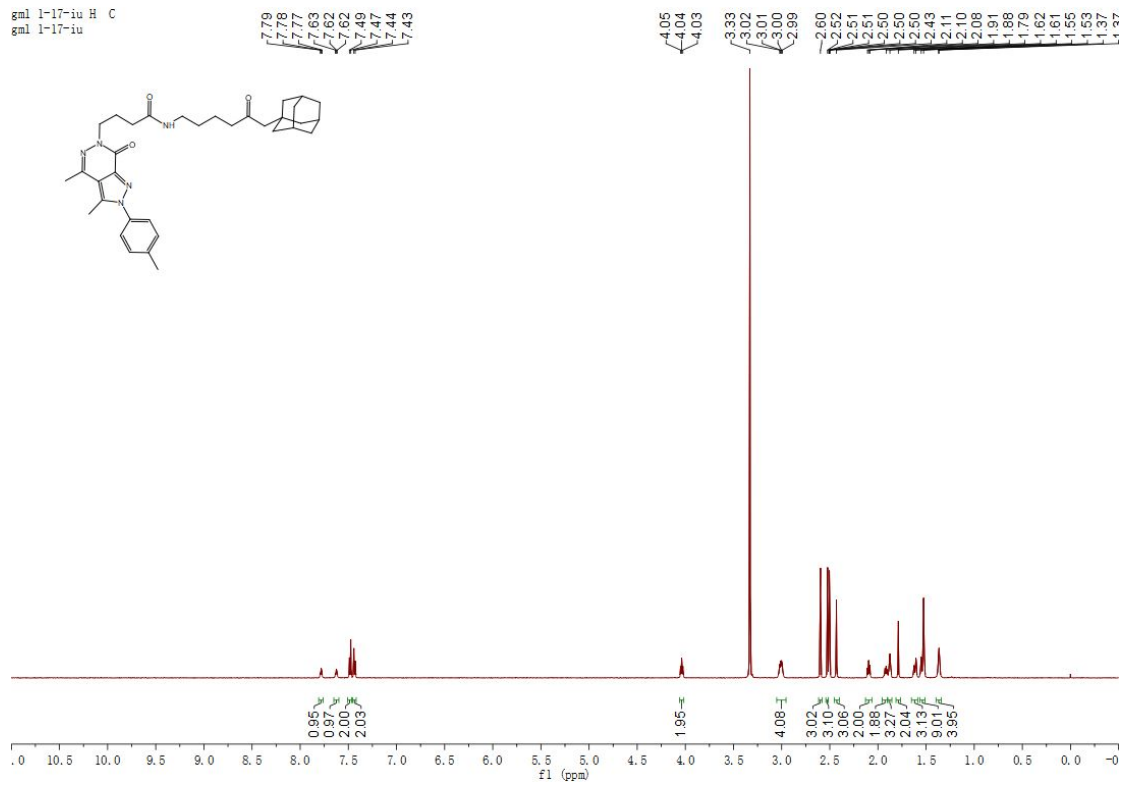

8ml 1-17-iu H C  
8ml 1-17-iu

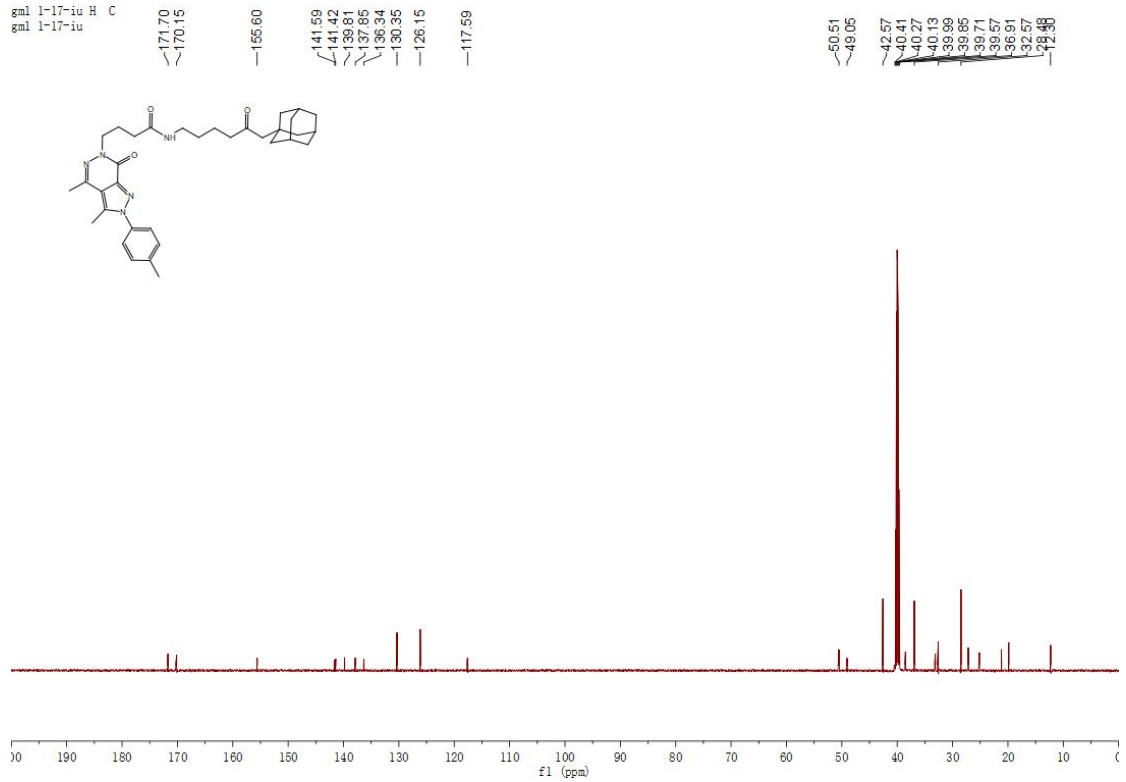

## 定性分析报告

|                        |                                               |              |                    |
|------------------------|-----------------------------------------------|--------------|--------------------|
| 数据文件名称                 | gml-1-17-iv.d                                 | 样品名称         |                    |
| 样品类型                   | Sample                                        | 位置           | P1-B5              |
| 仪器名称                   | Instrument 1                                  | 用户名          |                    |
| 采集方法                   | MS-POS.m                                      | 采集时间         | 2021/9/16 11:14:24 |
| IRM 校正状态               | 成功                                            | DA 方法        | Default.m          |
| 注释                     |                                               |              |                    |
| 设备类型                   | QuadrupoleTimeOfFlight                        | Sample Group |                    |
| Info.                  |                                               | Stream Name  | LC 1               |
| Acquisition SW Version | 6200 series TOF/6500 series Q-TOF 10.1 (48.0) |              |                    |

### 用户色谱图

裂解电压 120 碰撞能量 0 电离模式 ESI

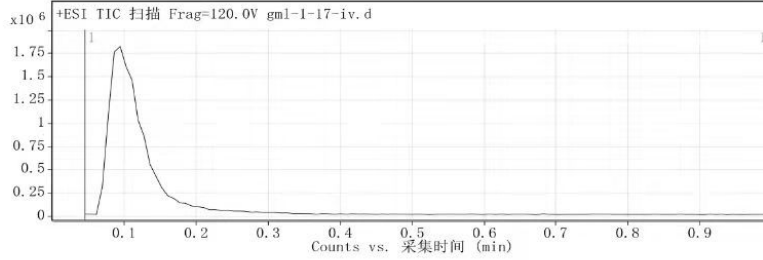

### 用户质谱图

裂解电压 120 碰撞能量 0 电离模式 ESI

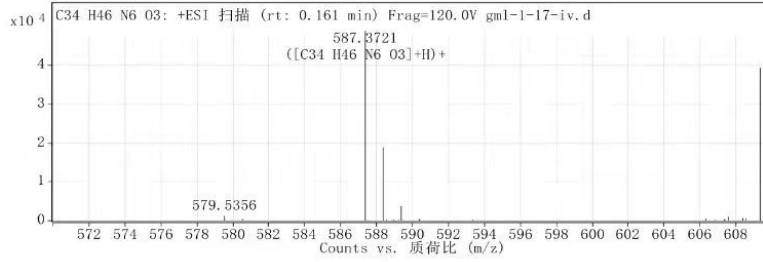

### 峰列表

| m/z      | z | 丰度       | 分子式           | 离子     |
|----------|---|----------|---------------|--------|
| 274.276  |   | 1793.96  |               |        |
| 294.1954 | 2 | 1893.47  |               |        |
| 338.3439 | 1 | 5006.17  |               |        |
| 587.3721 | 1 | 48861.73 | C34 H46 N6 O3 | (M+H)+ |
| 588.3748 | 1 | 18955.71 | C34 H46 N6 O3 | (M+H)+ |
| 589.3764 | 1 | 3779.68  | C34 H46 N6 O3 | (M+H)+ |
| 609.3533 | 1 | 39430.03 |               |        |
| 610.3542 | 1 | 14201.76 |               |        |
| 611.3582 | 1 | 3183.04  |               |        |
| 922.0098 | 1 | 3276.77  |               |        |

### 分子式计算器元素限制

| 元素 | 最小 | 最大 |
|----|----|----|
| C  | 3  | 34 |

# Compound 17c

gml 1-53-iu(30)  
gml 1-53-iu(30)

7.76  
7.77  
7.63  
7.62  
7.60  
7.48  
7.43

4.06  
4.04  
4.03

3.34  
3.02  
3.01  
2.99  
2.90  
2.93  
2.74  
2.70  
2.65  
1.92  
1.91  
1.79  
1.64  
1.62  
1.56  
1.38  
1.36  
1.25

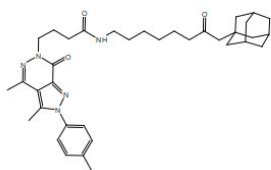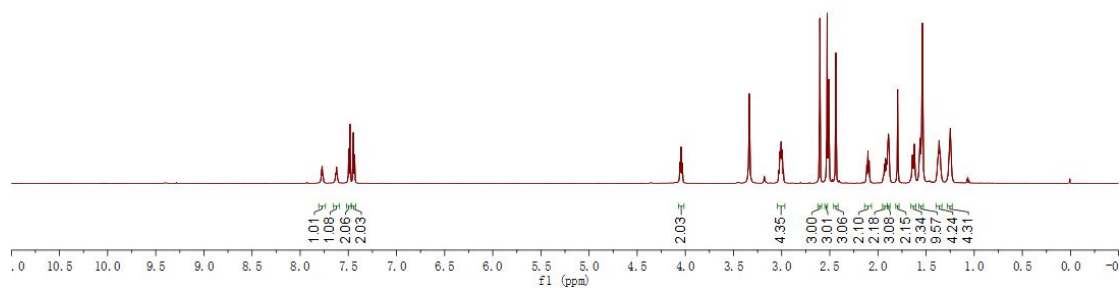

gml 1-53-iu(30)  
gml 1-53-iu(30)

171.65  
170.08

155.59

141.60  
141.39  
138.79  
137.83  
136.34  
130.34  
126.15  
117.59

50.63  
49.06

42.59  
40.42  
40.26  
40.14  
40.00  
39.86  
39.72  
39.65  
38.82  
38.60  
41.30

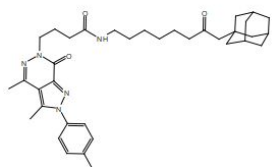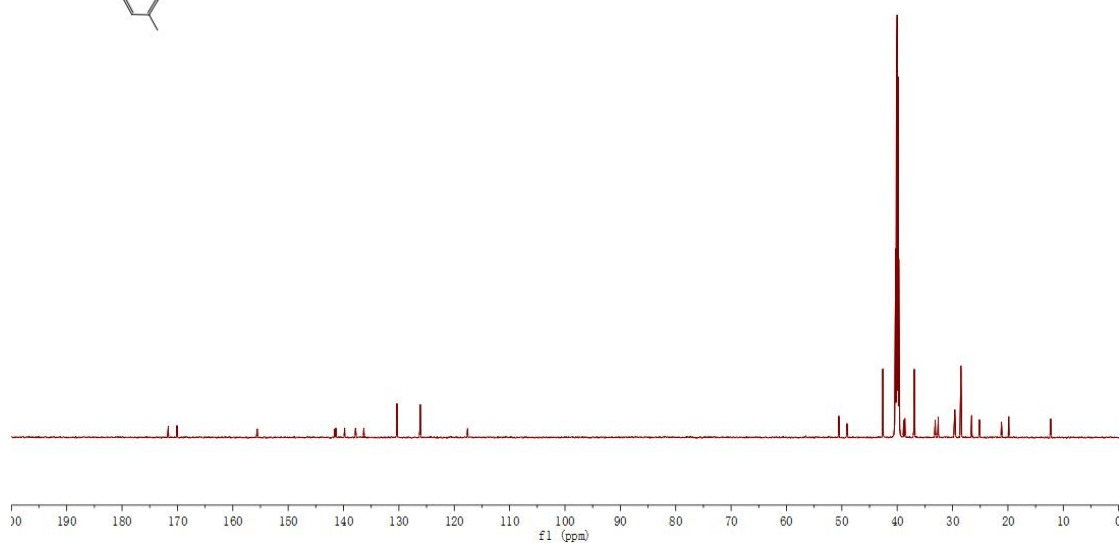

Qualitative Analysis Report

Data Filename 1-53-IV.d Sample Name  
 Sample Type Sample Position P1-A3  
 Instrument Name Instrument 1 User Name  
 Acq Method MS-POS.m Acquired Time 7/28/2020 1:09:30 PM  
 IRM Calibration Status Success DA Method MZ-500.m  
 Comment

Sample Group Info.  
 Stream Name LC 1 Acquisition SW Version 6200 series TOF/6500 series Q-TOF B.06.01 (B6157)

Data Filename 1-53-IV-N.d Sample Name  
 Sample Type Sample Position P1-A3  
 Instrument Name Instrument 1 User Name  
 Acq Method MS-NEG.m Acquired Time 7/28/2020 1:38:42 PM  
 IRM Calibration Status Success DA Method MZ-500.m  
 Comment

Sample Group Info.  
 Stream Name LC 1 Acquisition SW Version 6200 series TOF/6500 series Q-TOF B.06.01 (B6157)

User Spectra

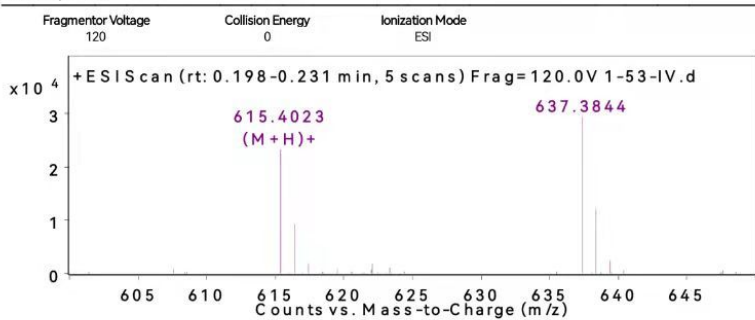

Peak List

| m/z      | z | Abund    | Formula       | Ion    |
|----------|---|----------|---------------|--------|
| 121.052  |   | 10522.01 |               |        |
| 130.1606 |   | 16921.51 |               |        |
| 141.1031 |   | 16574.65 |               |        |
| 141.1163 |   | 31637.17 |               |        |
| 410.111  | 1 | 37221.41 |               |        |
| 412.1082 | 1 | 25790.39 |               |        |
| 615.4023 | 1 | 23249.92 | C36 H50 N6 O3 | (M+H)+ |
| 637.3844 | 1 | 29390.03 |               |        |
| 638.3866 | 1 | 12126.36 |               |        |
| 922.0097 |   | 16723.47 |               |        |

Formula Calculator Element Limits

| Element | Min | Max |
|---------|-----|-----|
|         |     |     |

# Compound 17d

8ml 1-59-IV-32  
8ml 1-59-IV-32

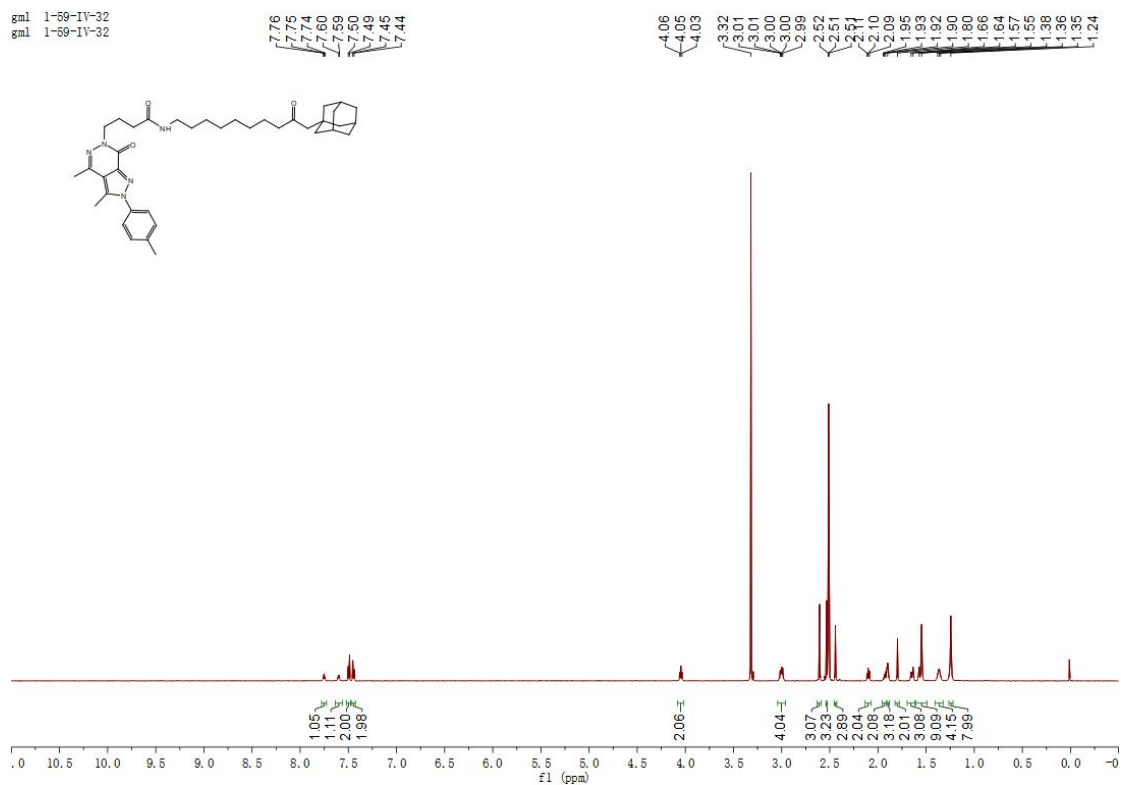

8ml 1-59-IV-1  
8ml 1-59-IV-1

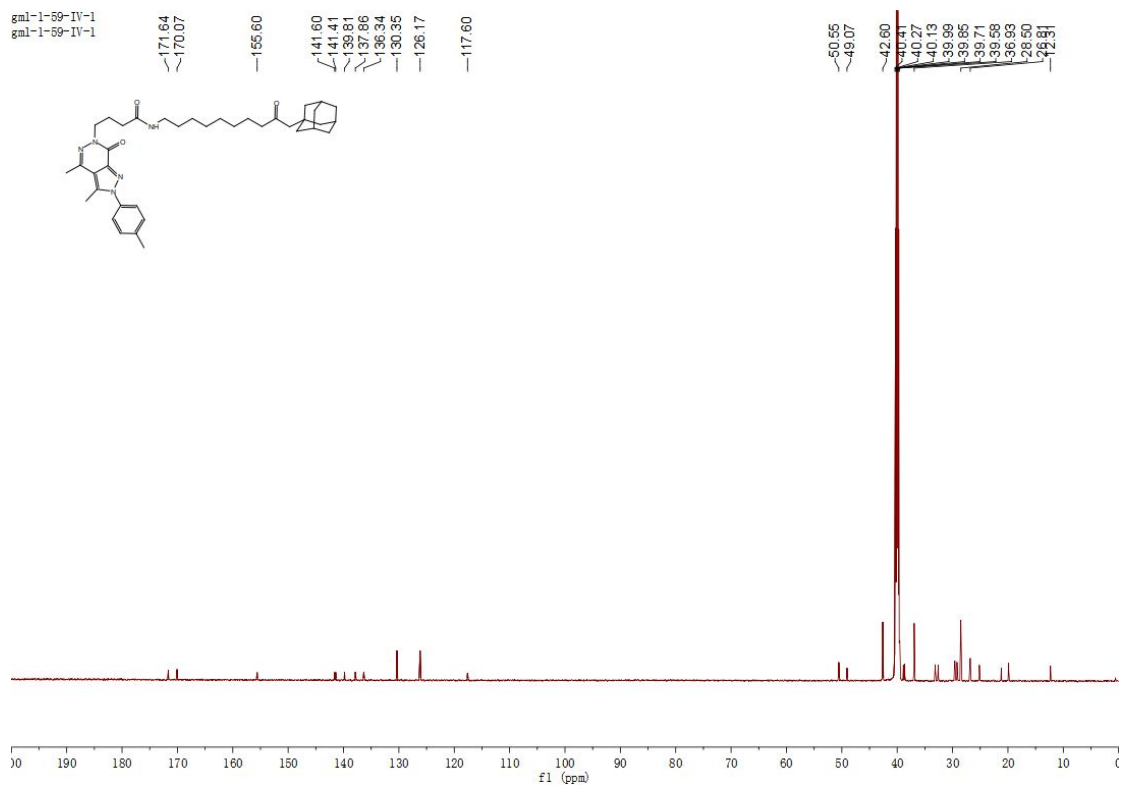



Qualitative Analysis Report

Data Filename 1-59-IV.d Sample Name  
 Sample Type Sample Position P1-A4  
 Instrument Name Instrument 1 User Name  
 Acq Method MS-POS.m Acquired Time 7/28/2020 1:11:11 PM  
 IRM Calibration Status Success DA Method MZ-500.m  
 Comment

Sample Group Info.  
 Stream Name LC 1 Acquisition SW Version 6200 series TOF/6500 series  
 Q-TOF B.06.01 (B6157)

Data Filename 1-59-IV-N.d Sample Name  
 Sample Type Sample Position P1-A4  
 Instrument Name Instrument 1 User Name  
 Acq Method MS-NEG.m Acquired Time 7/28/2020 1:40:23 PM  
 IRM Calibration Status Success DA Method MZ-500.m  
 Comment

Sample Group Info.  
 Stream Name LC 1 Acquisition SW Version 6200 series TOF/6500 series  
 Q-TOF B.06.01 (B6157)

User Spectra

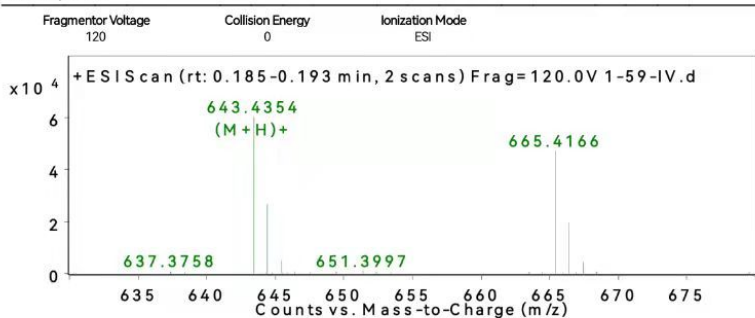

| Peak List |   |          |               |        |
|-----------|---|----------|---------------|--------|
| m/z       | z | Abund    | Formula       | Ion    |
| 121.0551  |   | 9229.91  |               |        |
| 130.1591  | 1 | 13458.72 |               |        |
| 141.1137  | 1 | 31990.68 |               |        |
| 410.1114  | 1 | 22654.98 |               |        |
| 412.1085  | 1 | 16046.29 |               |        |
| 643.4354  | 1 | 60309.74 | C38 H54 N6 O3 | (M+H)+ |
| 644.4365  | 1 | 26819.41 | C38 H54 N6 O3 | (M+H)+ |
| 665.4166  | 1 | 47190.78 |               |        |
| 666.419   | 1 | 19572.62 |               |        |
| 922.0098  | 1 | 12972.92 |               |        |

| Formula Calculator Element Limits |     |     |
|-----------------------------------|-----|-----|
| Element                           | Min | Max |
|                                   |     |     |

# Compound 17e

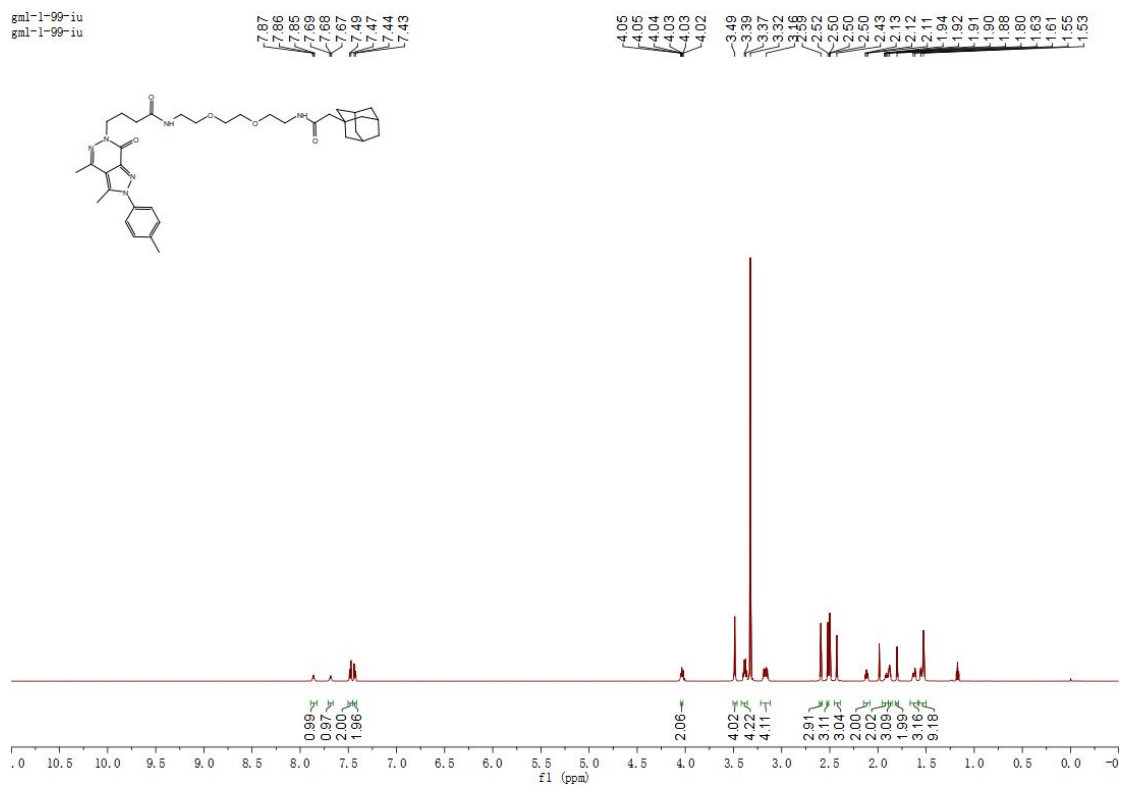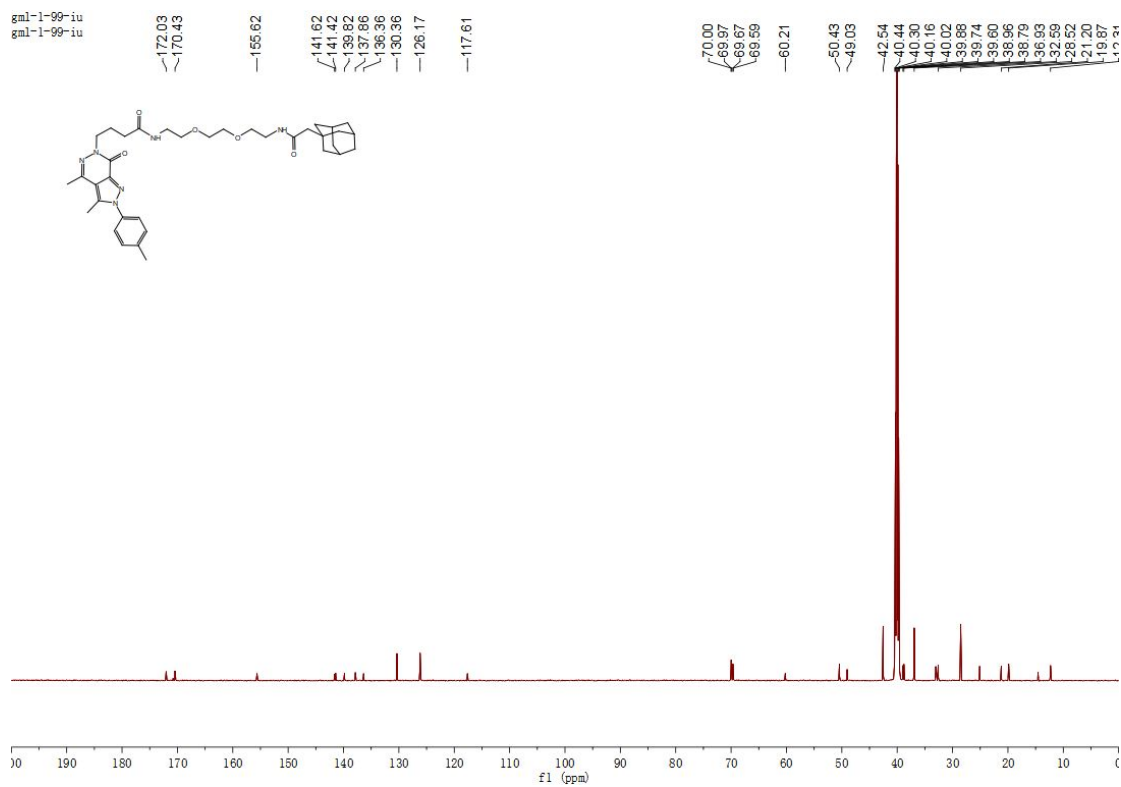

## 定性分析报告

|                        |                                               |              |                   |
|------------------------|-----------------------------------------------|--------------|-------------------|
| 数据文件名称                 | GML-1-99-IV.d                                 | 样品名称         |                   |
| 样品类型                   | Sample                                        | 位置           | P1-B3             |
| 仪器名称                   | Instrument 1                                  | 用户名          |                   |
| 采集方法                   | MS-POS.m                                      | 采集时间         | 2020/9/2 10:10:36 |
| IRM 校正状态               | 成功                                            | DA 方法        | Default.m         |
| 注释                     |                                               |              |                   |
| 设备类型                   | QuadrupoleTimeOfFlight                        | Sample Group |                   |
| Info.                  |                                               | Stream Name  | LC 1              |
| Acquisition SW Version | 6200 series TOF/6500 series Q-TOF 10.1 (48.0) |              |                   |

### 用户色谱图

裂解电压 120 碰撞能量 0 电离模式 ESI

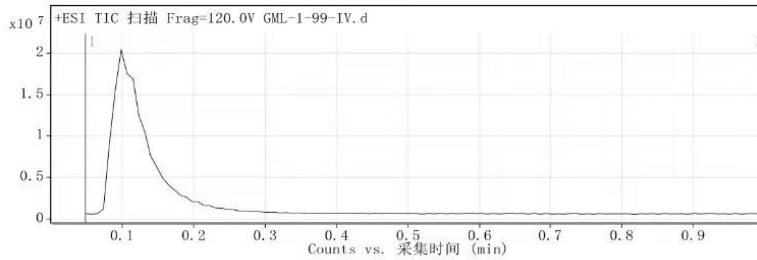

### 用户质谱图

裂解电压 120 碰撞能量 0 电离模式 ESI

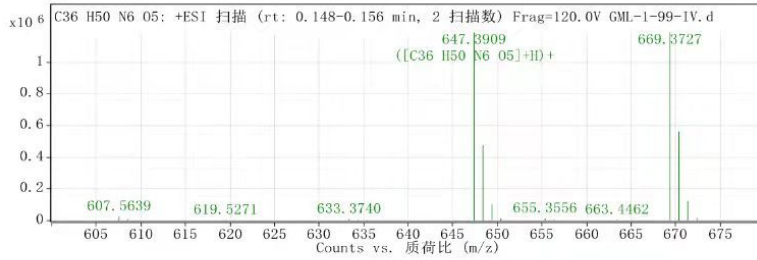

### 峰列表

| m/z      | z | 丰度         | 分子式           | 离子     |
|----------|---|------------|---------------|--------|
| 130.1581 | 1 | 105812.92  |               |        |
| 324.1991 | 2 | 33817.92   |               |        |
| 579.5335 | 1 | 34547.67   |               |        |
| 607.5639 | 1 | 26849.52   |               |        |
| 647.3909 | 1 | 1186818.63 | C36 H50 N6 O5 | (M+H)+ |
| 648.3936 | 1 | 476818.38  | C36 H50 N6 O5 | (M+H)+ |
| 649.3968 | 1 | 104044.53  | C36 H50 N6 O5 | (M+H)+ |
| 669.3727 | 1 | 1443115    |               |        |
| 670.376  | 1 | 561308.5   |               |        |
| 671.379  | 1 | 126028.61  |               |        |

### 分子式计算器元素限制

| 元素 | 最小 | 最大 |
|----|----|----|
| C  | 3  | 60 |

# Compound 17f

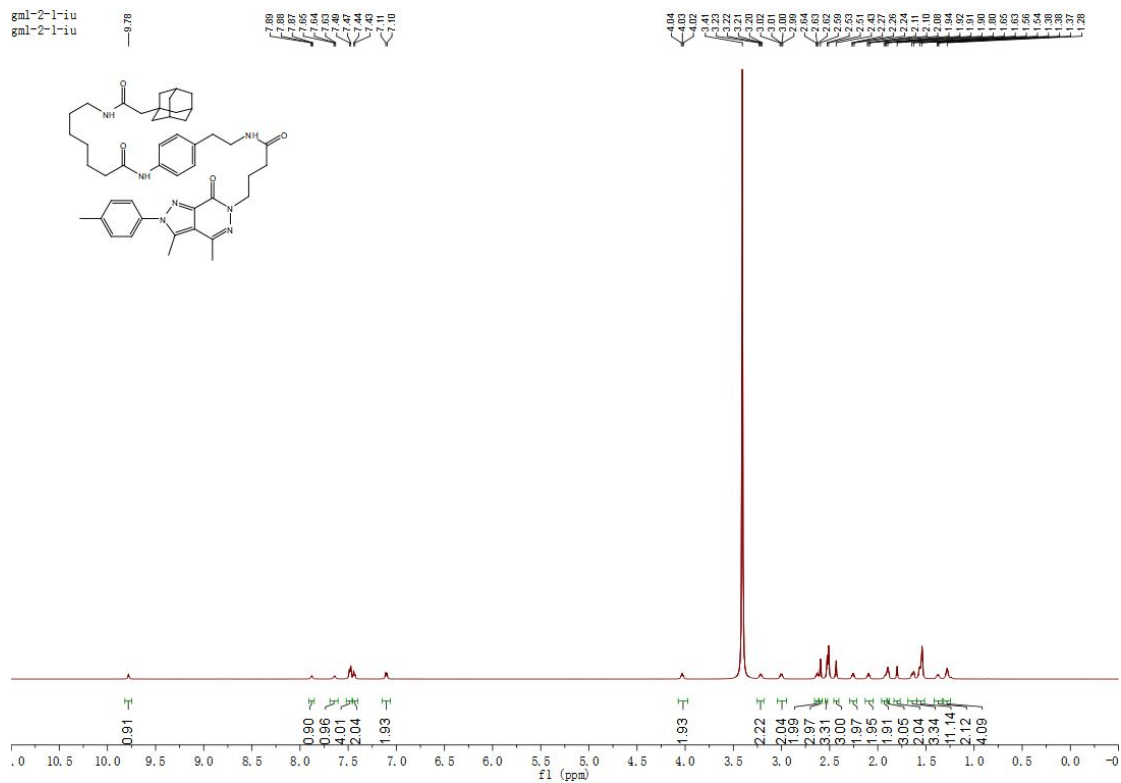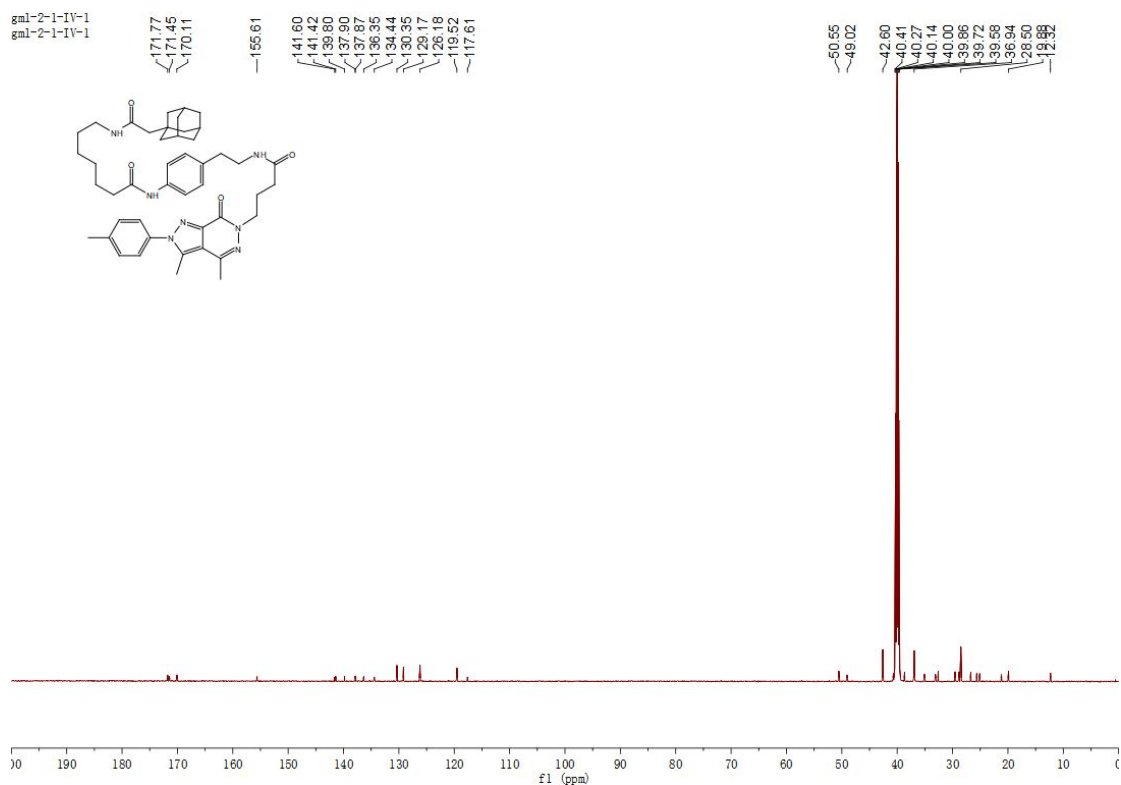

## Qualitative Analysis Report

|                               |              |                      |                                   |
|-------------------------------|--------------|----------------------|-----------------------------------|
| <b>Data Filename</b>          | gml-2-1-IV.d | <b>Sample Name</b>   |                                   |
| <b>Sample Type</b>            | Sample       | <b>Position</b>      | P1-A8                             |
| <b>Instrument Name</b>        | Instrument 1 | <b>User Name</b>     |                                   |
| <b>Acq Method</b>             | MS-POS.m     | <b>Acquired Time</b> | 12/3/2020 10:55:37 AM (UTC+08:00) |
| <b>IRM Calibration Status</b> | Success      | <b>DA Method</b>     | mz-300.m                          |

|                               |                                               |                                 |                                   |
|-------------------------------|-----------------------------------------------|---------------------------------|-----------------------------------|
| <b>Sample Group</b>           |                                               | <b>Info.</b>                    |                                   |
| <b>Stream Name</b>            | LC 1                                          | <b>Acquisition Time (Local)</b> | 12/3/2020 10:55:37 AM (UTC+08:00) |
| <b>Acquisition SW Version</b> | 6200 series TOF/6500 series Q-TOF 10.1 (48.0) | <b>QTOF Driver Version</b>      | 10.01.00                          |
| <b>QTOF Firmware Version</b>  | 9.808                                         | <b>Tune Mass Range Max.</b>     | 3200                              |

### Spectra

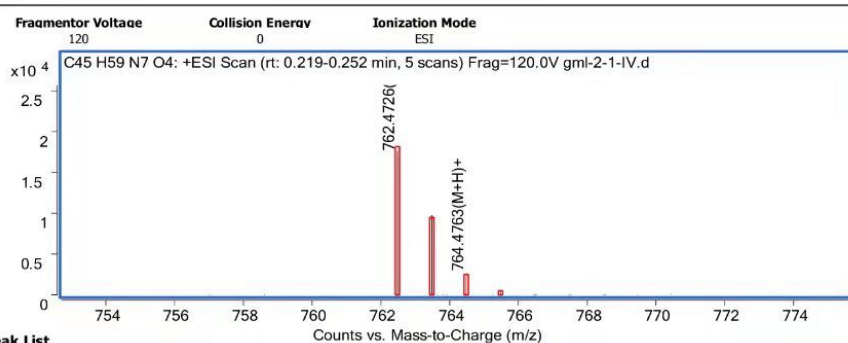

| <b>m/z</b> | <b>z</b> | <b>Abund</b> | <b>Formula</b> | <b>Ion</b> |
|------------|----------|--------------|----------------|------------|
| 121.0509   |          | 5222.86      |                |            |
| 141.1133   | 1        | 23221.11     |                |            |
| 381.7412   | 2        | 8335.76      |                |            |
| 382.2434   | 2        | 4409.66      |                |            |
| 762.4726   | 1        | 17656.51     | C45 H59 N7 O4  | (M+H)+     |
| 763.476    | 1        | 9824.15      | C45 H59 N7 O4  | (M+H)+     |
| 784.4556   | 1        | 50156.51     |                |            |
| 785.458    | 1        | 25850.09     |                |            |
| 786.4593   | 1        | 6388.18      |                |            |
| 922.0098   | 1        | 6228.22      |                |            |

#### Formula Calculator Element Limits

| <b>Element</b> | <b>Min</b> | <b>Max</b> |
|----------------|------------|------------|
| C              | 3          | 60         |
| H              | 0          | 120        |
| O              | 4          | 4          |
| N              | 7          | 7          |
| S              | 0          | 0          |

### Reference:

- Cheng, J.; Li, Y.; Wang, X.; Dong, G.; Sheng, C. Discovery of novel pped degraders for the treatment of kras mutant colorectal cancer. *J. Med. Chem.* **2020**, *63*, 7892-7905.
